# Supplementary material
Source: PubMed Central journal article supplement (PMC5507670)
Supplement: NIHMS874720-supplement-Supplemental_Information.pdf [file NIHMS874720-supplement-Supplemental_Information.pdf]

# **Five-Membered Ring Peroxide Selectively Initiates Ferroptosis in Cancer Cells**

Rachel P. Abrams<sup>1,2</sup>, William L. Carroll<sup>2\*</sup>, and K. A. Woerpel<sup>1\*</sup>

<sup>1</sup>Department of Chemistry, New York University, 100 Washington Square East, New York, NY 10003, USA; <sup>2</sup>Laura and Isaac Perlmutter Cancer Center, New York University Langone Medical Center, 522 First Avenue, Smilow Building 12 Floor, Room 1211, New York, NY 10016, USA. \*e-mail: [william.carroll@nyumc.org](mailto:william.carroll@nyumc.org) or [kwoerpel@nyu.edu](mailto:kwoerpel@nyu.edu)

## **Supplementary Information**

### **Table of Contents**

|                                    | Pages |
|------------------------------------|-------|
| Supplementary Figures              | 2–9   |
| Supplementary Discussion           | 10    |
| Supplementary Methods              | 11–29 |
| X-ray Crystallographic Information | 30–39 |
| Selected Spectra                   | 40–46 |
| Supplementary References           | 47–49 |

**Supplementary Figures**

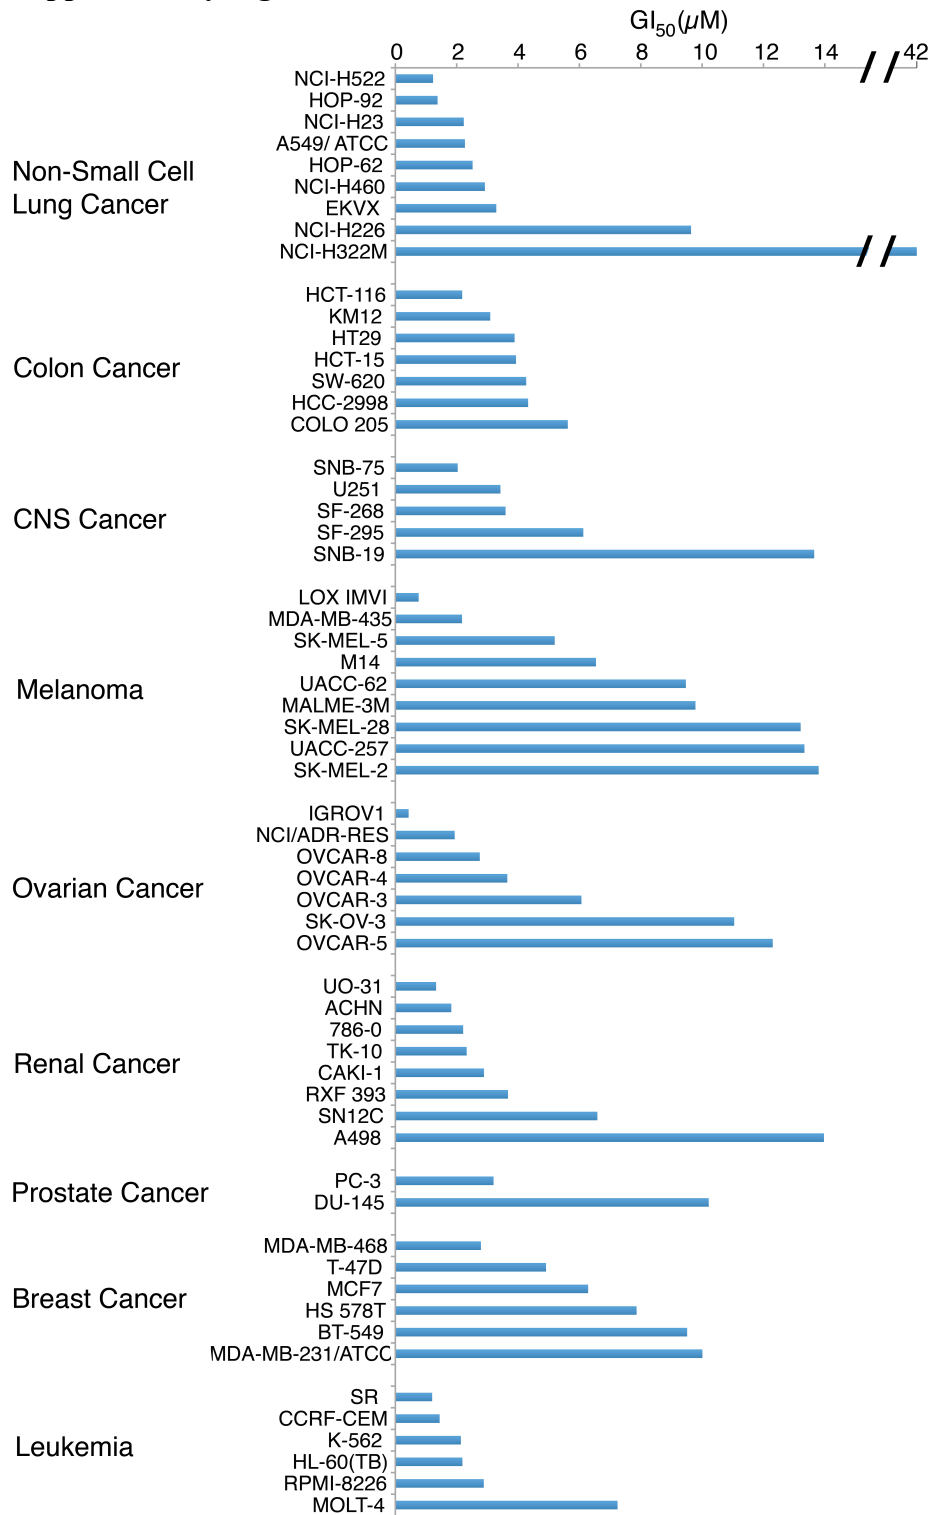

**Supplementary Figure 1.** The concentrations at which 50% of cell growth was inhibited (GI<sub>50</sub>) grouped by tissue of origin to illustrate that FINO<sub>2</sub> is both active and inactive in a range of cell

lines from different tissues. Data obtained by the Developmental Therapeutic Program of the National Cancer Institute.

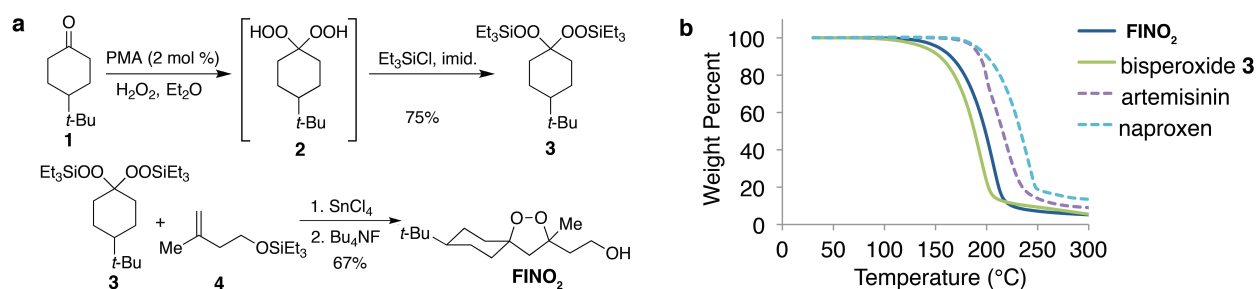

**Supplementary Figure 2.** Synthesis and stability. (a) Synthesis of  $\text{FINO}_2$ ; Phosphomolybdic acid (PMA), imidazole (imid.). (b) Thermogravimetric analysis. The thermal stability of  $\text{FINO}_2$  was corroborated by NMR analysis of a sample that had been heated to 150 °C.

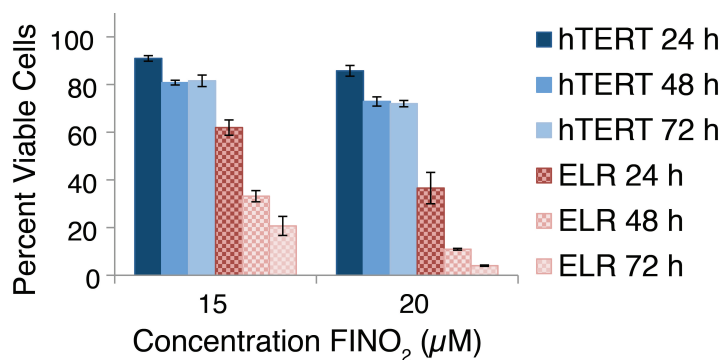

**Supplementary Figure 3.** Selectivity of  $\text{FINO}_2$  measured by Promega CellTiter-Glo<sup>®</sup> Luminescence Assay. Cell viability decreases for cancerous cells (ELR), but not non-cancerous cells (hTERT) over time, resulting in the best selectivity being observed after 72 hours of treatment with  $\text{FINO}_2$ .

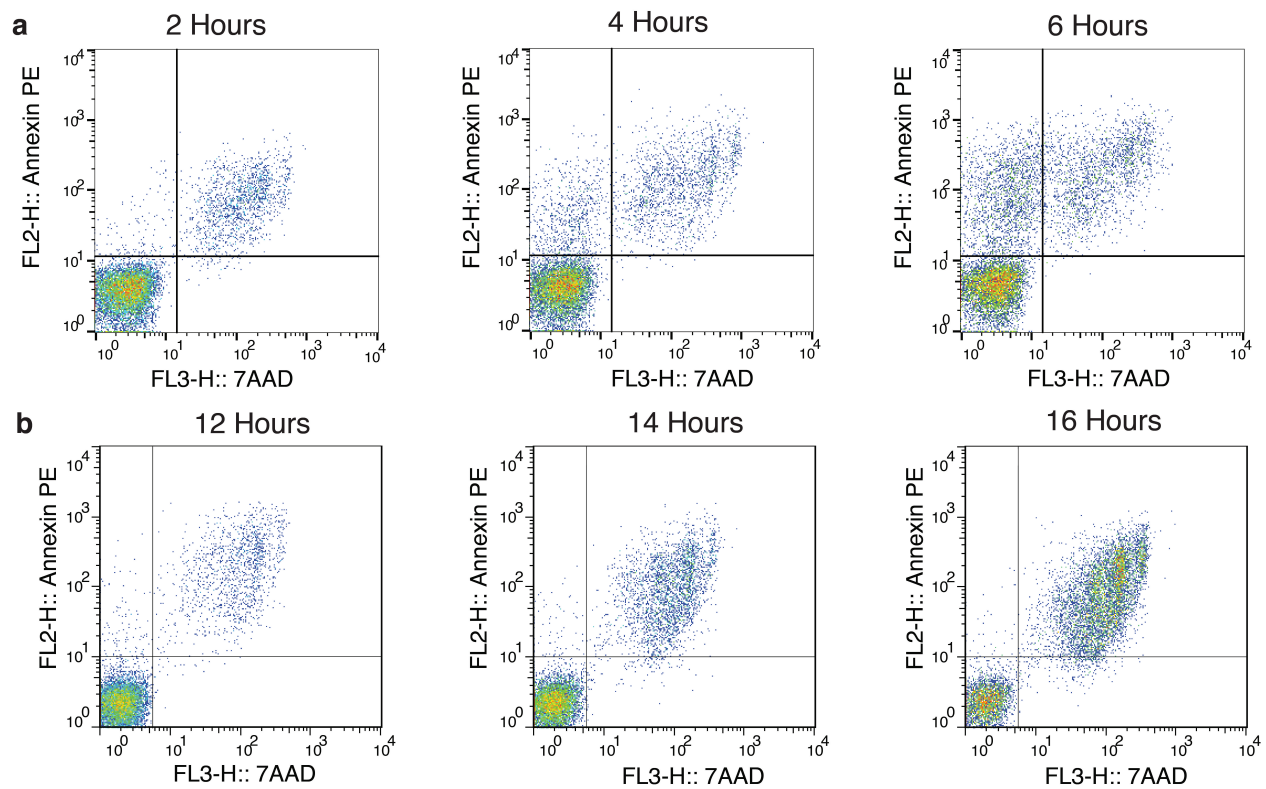

**Supplementary Figure 4.** Annexin V-PE and 7AAD apoptosis assay. a) Annexin V-PE staining is observed prior to 7AAD with 50  $\mu$ M of etoposide treatment at indicated time points. b) Annexin V-PE staining is not observed prior to 7AAD incorporation with 6  $\mu$ M of FINO<sub>2</sub> treatment at indicated time points.

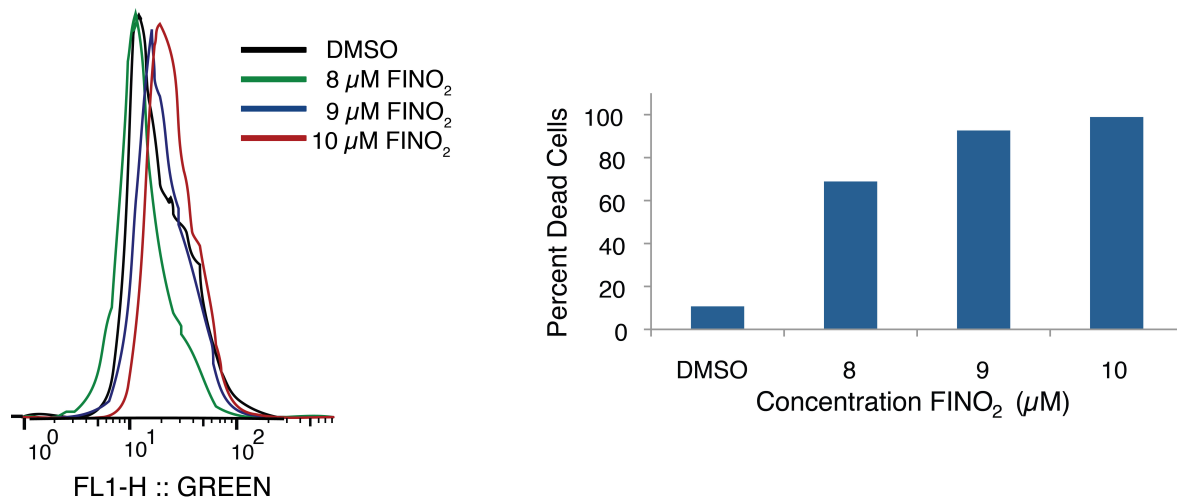

**Supplementary Figure 5.** The BioVision MitoCapture™ Mitochondrial Apoptosis Detection Kit showed a shift in green fluorescence. The shift in fluorescence was not observed until after the majority of the cells were dead, as indicated by Trypan Blue staining.

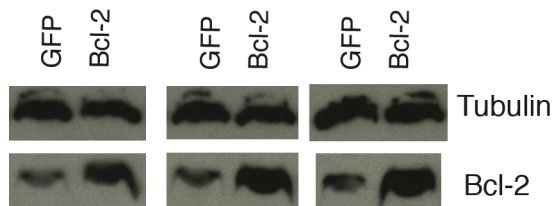

**Supplementary Figure 6.** Western blot showing overexpression of the bcl-2 protein in cells collected the day of experiment plating.

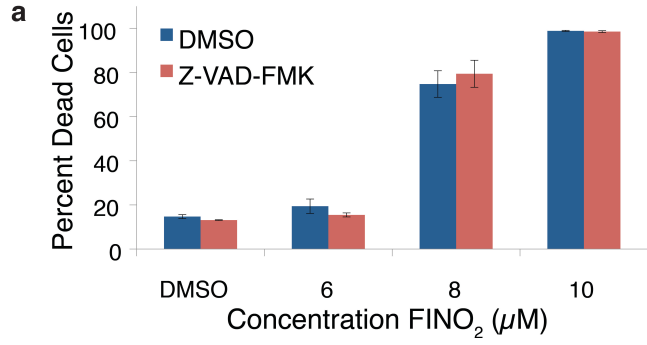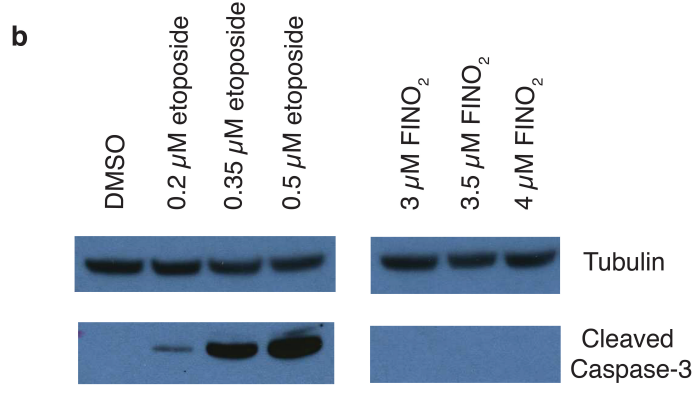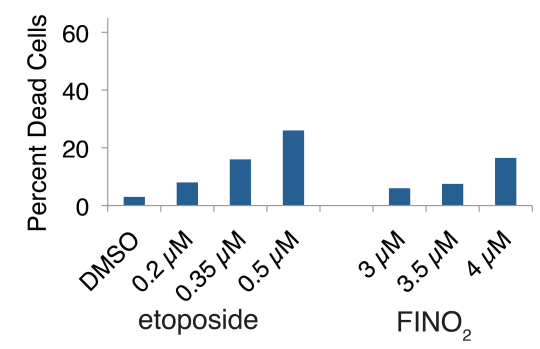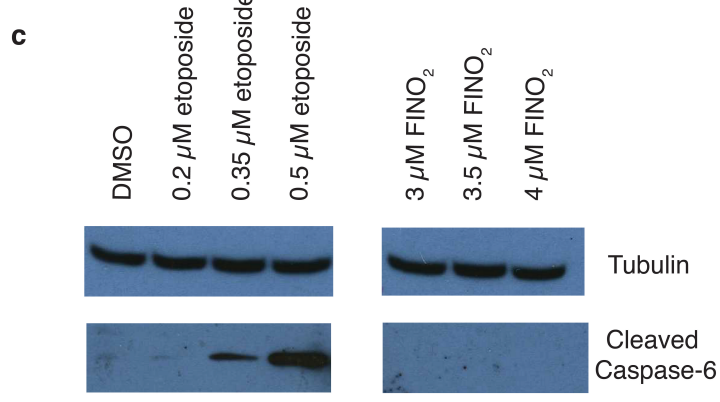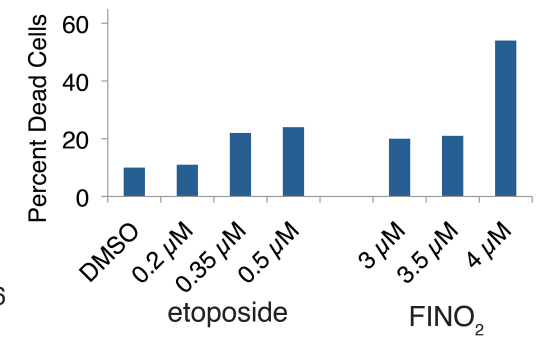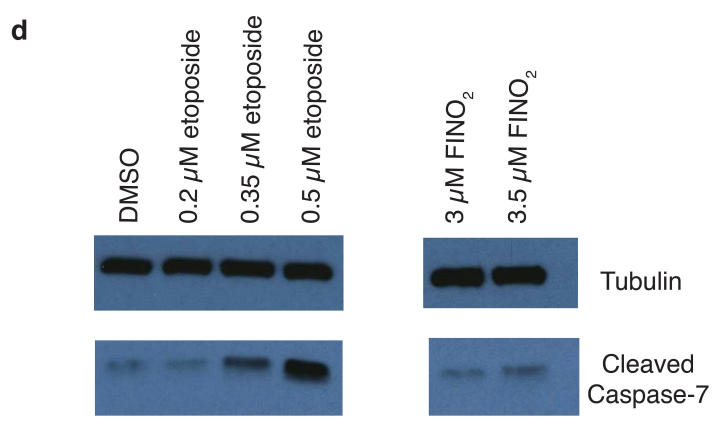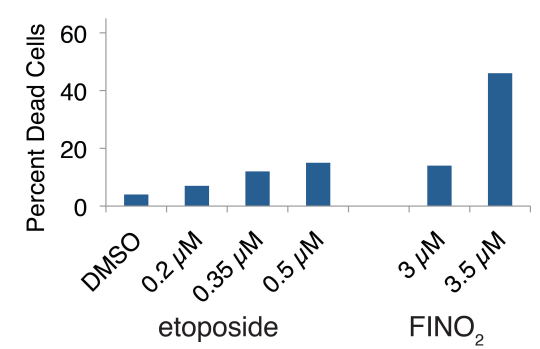

**Supplementary Figure 7.** Caspase activation is not involved in cell death induced by FINO<sub>2</sub>. (a) Pretreatment with 2.4 μM of a pan-caspase inhibitor (Z-VAD-FMK) does not inhibit cell death. Percent dead cells indicate the Annexin V and 7AAD positive cell population. (b) Activation of executioner caspase-3, -6, or -7 was not observed by the detection of cleaved proteins by Western blot. Similar quantities of cell death induced by chemotherapeutic agents, such as etoposide, result in activation of executioner caspases. All caspase antibodies were used at 1:500 dilutions and incubated overnight. Tubulin was used at a 1:5000 dilution and incubated overnight. Trypan Blue staining was used to indicate cell death.

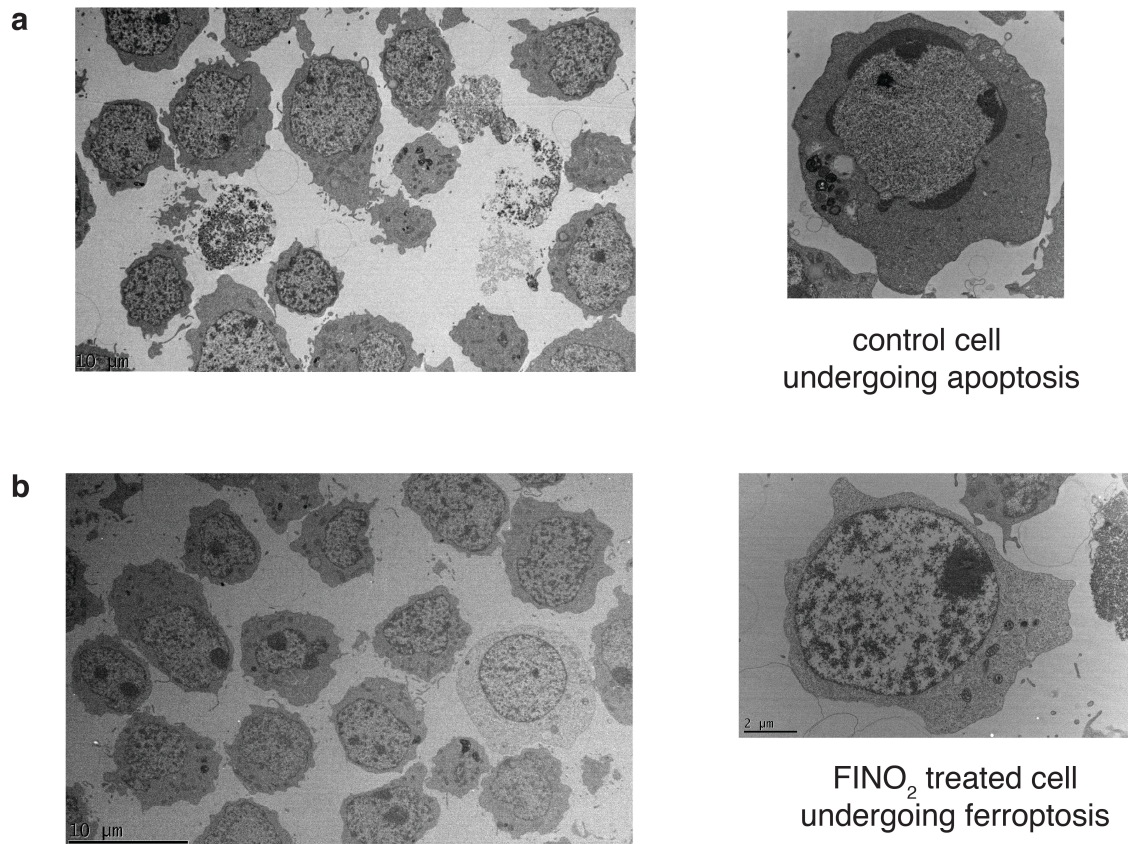

**Supplementary Figure 8.** Electron microscopy images of RS4;11 cells. a) Cells treated with vehicle only (DMSO) and example of RS4;11 cell undergoing apoptosis. b) Cells treated with

FINO<sub>2</sub> lacking hallmarks of apoptosis, necrosis, and autophagy (performed by the Microscopy Core at New York University Langone Medical Center).

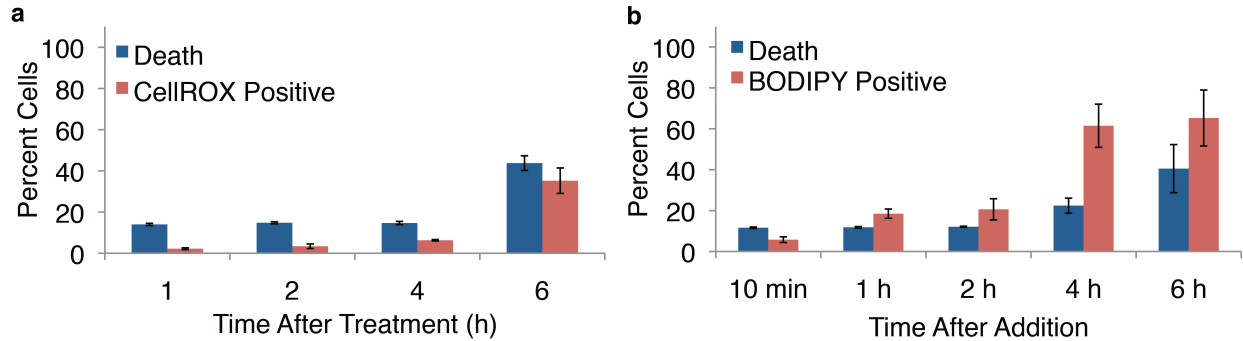

**Supplementary Figure 9.** A time-course experiment indicated FINO<sub>2</sub> does not react directly with oxidation probes. a) Cells were treated with 7  $\mu$ M of FINO<sub>2</sub> for indicated times and then the CellROX was added for 20 min following the appropriate protocol. b) Cells were treated with 6  $\mu$ M of FINO<sub>2</sub> and then the C11-BODIPY was added for 20 min following the appropriate protocol. These experiments verify there is no direct interaction between the redox probes and FINO<sub>2</sub> because at each time point FINO<sub>2</sub> was in contact with the probe for the same amount of time (20 min).

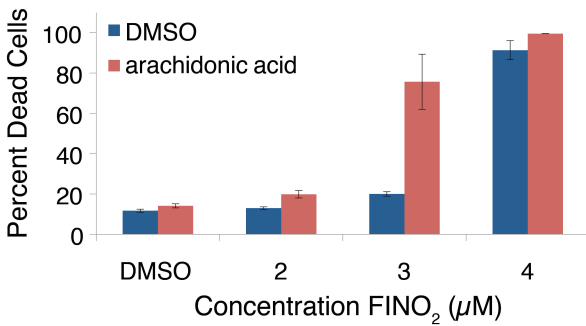

**Supplementary Figure 10.** Pretreatment of RS4;11 cells with 10  $\mu$ M of arachidonic acid for 2 hours caused increased cell death in response to FINO<sub>2</sub>. Percent dead cells indicate the Annexin V and 7AAD positive cell population.



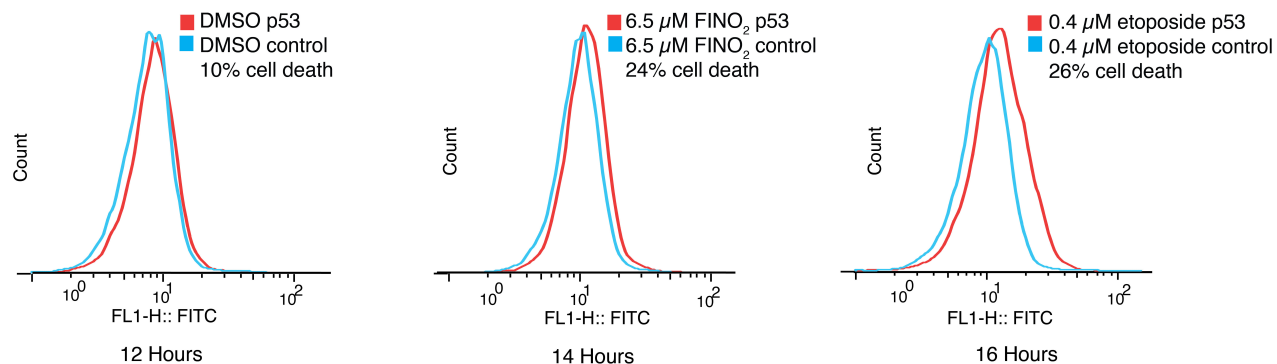

**Supplementary Figure 11.** In contrast to etoposide, FINO<sub>2</sub> did not increase p53 protein expression even in cells expressing wild type p53 (RS4;11). (a) Expression of p53 is not increased by FINO<sub>2</sub> treatment (middle) as it does with etoposide (right). A representative figure from at least three independent experiments is shown. Trypan Blue staining was used to indicate cell death.

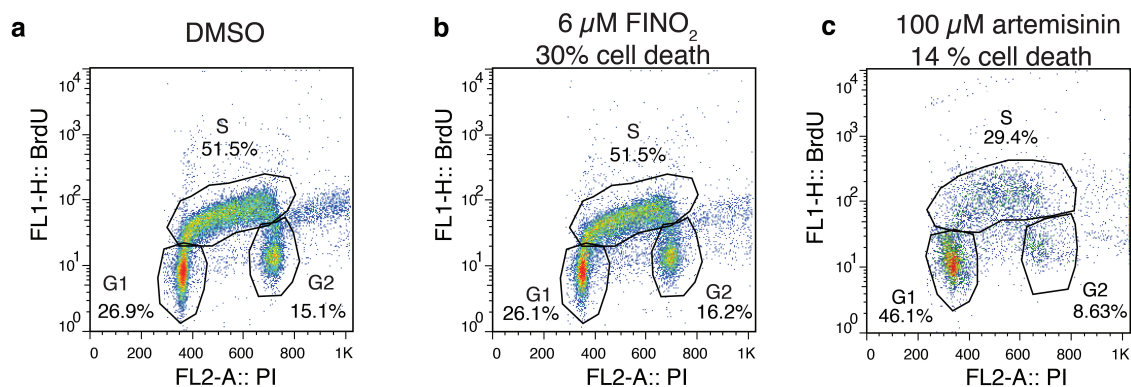

**Supplementary Figure 12.** Cell cycle analysis revealed no change in distribution upon treatment with FINO<sub>2</sub>. Cell cycle distribution was observed by monitoring bromodeoxyuridine (BrdU) incorporation and propidium iodide (PI) staining<sup>1</sup>. Trypan Blue staining was used to indicate cell death. A representative figure from at least three independent experiments is shown.

## Supplementary Discussion

The previously reported synthesis<sup>2</sup> was optimized starting with one gram of ketone **1**, which provided the protected bisperoxide **3** in 75% yield.<sup>3</sup> Carrying forward one gram of protected bisperoxide **3**, FINO<sub>2</sub> was obtained in 67% yield.<sup>2</sup> This synthesis involves four linear steps (five total) from commercially available starting material, only two of which required purification, with an overall yield of pure FINO<sub>2</sub> of about 50%. This route provided quantities surpassing the amount needed for biological testing and allows for the production of gram quantities of FINO<sub>2</sub>.

To address potential stability concerns on the use of organic peroxides as drugs, FINO<sub>2</sub> was subjected to thermogravimetric analysis. This method measures weight loss of a compound as a function of increasing temperature, and therefore gives information about a compound's stability.<sup>4</sup> The precursor, bisperoxide **3**, and FINO<sub>2</sub> are both stable to over 150 °C, suggesting that these compounds are more stable than might be anticipated for peroxide-containing structures. These temperatures are higher than would be required for the therapeutic use of these compounds and differ little in stability from artemisinin (C<sub>15</sub>H<sub>22</sub>O<sub>5</sub>) and naproxen (C<sub>14</sub>H<sub>14</sub>O<sub>3</sub>), which were chosen for comparison because they have similar numbers of carbon and oxygen atoms to FINO<sub>2</sub> (C<sub>15</sub>H<sub>28</sub>O<sub>3</sub>). The thermal stability of FINO<sub>2</sub> was corroborated by NMR analysis of a sample that had been heated to 150 °C.

## **Materials and Methods**

### **Cell Culture**

RS4;11 cells<sup>5</sup> obtained from the American Type Culture Collection (ATCC) were grown in RPMI-1640 medium supplemented with 10% fetal bovine serum (FBS) and 1% penicillin-streptomycin under 5% CO<sub>2</sub> at 37 °C. BJ-5ta (BJ-hTERT)<sup>6,7</sup> cells and 293T<sup>8</sup> cells obtained from the American Type Culture Collection (ATCC) were grown in DMEM medium supplemented with 10% fetal bovine serum (FBS) and 1% penicillin-streptomycin under 5% CO<sub>2</sub> at 37 °C. BJ-ELR<sup>9</sup> cells were generously donated by the laboratory of William Hahn at the Dana-Farber Cancer Institute and maintained under the same conditions as the BJ-5ta cells.

### **Chemical Compounds**

The synthesis of FINO<sub>2</sub> is described below. FINO<sub>2</sub> was prepared as a 10 mM stock solution in DMSO, aliquoted in single use portions, and frozen at -20 °C until the day of use. Serial dilutions of the 10 mM stock into water were performed for use at the indicated concentrations. All other compounds were obtained from Sigma-Aldrich unless otherwise indicated. Etoposide was prepared as a 4 mM stock solution in DMSO and serially diluted into water for use at the indicated concentrations.

### **Thermogravimetric Analysis (TGA)**

The PerkinElmer Pyris™ 1 TGA instrument and software were used to measure the thermal stability of various compounds under an atmosphere of nitrogen. A sample of 1–3 mg was heated from 30 to 300 °C at a rate of 10 °C/ minute for solid compounds and 1 °C/ minute for oils. The weight was measured at one-second intervals. All data points were plotted and a line of best fit is

displayed. All compounds were measured in at least two independent experiments with little variability observed between readings.

### **Cell Viability Assay**

BJ-hTERT and BJ-ELR cells were plated at 33,000 cells per mL in a white 96-well plate and the plate was returned to the cell culture incubator for 24 h. Either vehicle (DMSO in water) or indicated compound was added to achieve a 10-fold dilution by addition of 10  $\mu$ L of stock solution to 100  $\mu$ L of cells in media and the plate was returned to the cell culture incubator for the indicated times. The Promega CellTiter-Glo<sup>®</sup> Luminescence Assay was used as indicated in the manual, and luminescence was read on a FlexStation 3 Multi-Mode Microplate Reader. All percent viabilities reported are normalized to vehicle-treated cells. All experiments were performed in triplicate, and error bars reflect the standard deviation of one experiment. A representative graph of at least three independent experiments is shown.

### **Expression Level of p53**

RS4;11 cells were plated at 666,000 cells per mL. Either vehicle (DMSO in water) or indicated compound was added to achieve a 10-fold dilution by addition of 100  $\mu$ L of stock solution to 1 mL of cells in media and the plate was returned to the cell culture incubator for 24 h. Trypan Blue staining and counting using a hemocytometer determined the percentage of cell death in each sample. The cells were fixed and permeabilized using the BD Cytfix/Cytoperm<sup>™</sup> Fixation Permeabilization kit (554714). A fluorescein isothiocyanate (FITC)-conjugated p53 antibody or control antibody (FITC Mouse Anti-p53 Antibody Set, BD Pharmingen<sup>™</sup>) was incubated with the cells at a 1:50 dilution for 30 minutes on ice and in the dark. The samples were processed by

flow cytometry on the BD FACSCalibur cell analyzer. Analysis was conducted using FlowJo (Tree Star, Inc.). Representative results of at least three independent experiments are shown.

### **Annexin V-PE and 7-Aminoactinomycin D (7AAD) Apoptosis Assay**

RS4;11 cells were plated at 666,000 cells per mL. Either vehicle (DMSO in water) or indicated compound was added to achieve a 10-fold dilution by addition of 50  $\mu$ L of stock solution to 500  $\mu$ L of cells in media and the plate was returned to the cell culture incubator for the indicated times. The BD Pharmagen™ PE Annexin V Apoptosis Detection Kit protocol was followed. The cells were pelleted and washed with phosphate-buffered saline (PBS) prior to staining with annexin V-PE and 7AAD for 20 minutes in the dark. The samples were transferred to flow cytometry tubes and were processed on the BD FACSCalibur cell analyzer. Analysis was conducted using FlowJo (Tree Star, Inc.). All experiments were performed in triplicate, and error bars reflect the standard deviation of one experiment. A representative graph of at least three independent experiments is shown.

### **Bcl-2 Overexpression**

pCDH-puro-Bcl2 was a gift from Jialiang Wang at Vanderbilt University Medical Center (Addgene plasmid #46971)<sup>10</sup>. plenti-neo-GFP was a gift from the laboratory of Mark Phillips at New York University Langone Medical Center. The cDNA constructs were transfected into 293T cells along with helper plasmids using the calcium phosphate method<sup>11,12</sup> to produce replication-defective virus. The supernatant was collected 48 h after transfection and used to transduce RS4;11 cells supplemented with 8 mg/mL of Polybrene®. The virus-containing medium was replaced after 24 h. The Bcl-2 overexpressing cells and the GFP control cells were then selected for by treatment with 2  $\mu$ g/mL of puromycin and 600  $\mu$ g/mL of G418, respectively.

Overexpression of Bcl-2 was confirmed by Western blot at the time of plating each experiment (Fig. S6). About one million cells were lysed in 100  $\mu$ L of 0.5% NP-40 lysis buffer also containing 50 mM of Tris-HCl, 150 mM of NaCl, 1 mM of PMSF, 1 mM of NaF, and protease inhibitor (GE Healthcare). The samples were incubated on ice for 15 min. The lysates were centrifuged at 12,000 rpm for 10 min at 4 °C. The protein was quantified, then subjected to electrophoresis on 12% SDS-Tris acrylamide gels and transferred to PVDF membranes. The membranes were incubated with 4% milk in PBST (0.1% tween) for 1 h followed by incubation with a 1:750 dilution of mouse monoclonal antibody to Bcl-2 (Santa Cruz, sc-7382) or a 1:5000 dilution of rabbit polyclonal antibody to  $\beta$ -Tubulin (Abcam, ab6046) for 2 h at room temperature. The membranes were washed with PBST then incubated with a 1:10,000 dilution of horseradish peroxidase (HRP)-conjugated secondary antibody to mouse or rabbit (GE Healthcare) for 1 h and developed using enhanced chemiluminescence (ECL; GE Healthcare). The response of GFP and Bcl-2 overexpressing cells to treatment with either etoposide or FINO<sub>2</sub> for 24 h was detected using the BD Pharmagen™ PE Annexin V Apoptosis Detection Kit, as described above.

### **Modulation of Cell Death with Chemical Compounds**

RS4;11 cells were plated at 666,000 cells per mL. Either vehicle or indicated compound was added to achieve the final desired concentration (listed below) and the plate was returned to the cell culture incubator for at least 2 h. Either vehicle, FINO<sub>2</sub>, or etoposide (as a control) were then added to give the indicated concentration and the plate was returned to the cell culture incubator for 24 h. Cell death was detected using the BD Pharmagen™ PE Annexin V Apoptosis Detection Kit, as described above. Representative results of at least three independent experiments are shown. Compound concentrations: 2.4  $\mu$ M of caspase inhibitor z-VAD-FMK

(BioVision); 20  $\mu$ M of deferoxamine (DFO); 38  $\mu$ M of ferric ammonium citrate (FAC); 500 nM of Ferrostatin; 200 nM of Liproxstatin (ChemDiv); 5  $\mu$ M of nordihydroguaiaretic acid (NDGA); 100  $\mu$ M of indomethacin; 10  $\mu$ M of arachidonic acid

### **Cell Cycle Analysis**

RS4;11 cells were plated at 666,000 cells per mL. Either vehicle (DMSO in water) or indicated compound was added to achieve a 100-fold dilution by addition of 30  $\mu$ L of stock solution to 3 mL of cells in media and the plate was returned to the cell culture incubator for 24 h. Trypan Blue staining and counting using a hemocytometer determined the percentage of cell death in each sample. The cells were treated with 5  $\mu$ g/mL of bromodeoxyuridine (BrdU) and the plate was returned to the cell culture incubator for 30 min. The cells were then fixed using 1 mL of cold 70% ethanol/ water solution and incubated overnight at 4  $^{\circ}$ C. After washing with PBS, the cells were resuspended in 200  $\mu$ L of 0.4 mg/mL pepsin in 0.1 M HCl (aq) and incubated at room temperature for 20 min. The cells were centrifuged and resuspended in 0.5 mL of 2 M HCl and incubated at 37  $^{\circ}$ C for 10 min. The cells were centrifuged and resuspended in 1.5 mL of 0.05 M of sodium borate (pH 8.5) and incubated for 5 min at room temperature. After washing twice with 0.1% bovine serum albumin (BSA) in PBS, the cells were resuspended in 50  $\mu$ L of a 1:50 dilution FITC-anti-BrdU (Rouche, 11202693001) in the dark at room temperature for 45 min. After washing with 0.1% BSA in PBS, the cells were resuspended in a solution containing 200  $\mu$ L of 0.1% BSA in PBS, 2  $\mu$ L of 100 mg/mL RNase A, and 10  $\mu$ L of 1 mg/mL propidium iodide (PI) and incubated for 1 h at 37  $^{\circ}$ C in the dark. After centrifugation, the cells were resuspended in 400  $\mu$ L of 0.1% BSA in PBS and transferred to flow cytometry tubes. The samples were processed on the BD FACSCalibur cell analyzer. Analysis was conducted using

FlowJo (Tree Star, Inc.). Representative results of at least three independent experiments are shown.

### **CellROX® Green Reagent and BODIPY 581/591 C11**

RS4;11 cells were plated at 666,000 cells per mL. Either vehicle (DMSO in water) or indicated compound was added to achieve a 10-fold dilution by addition of 50  $\mu$ L of stock solution to 500  $\mu$ L of cells in media and the plate was returned to the cell culture incubator for the indicated times. An aliquot of 1.1  $\mu$ L of a 2.5 mM stock of either CellROX® Green Reagent (Life Technologies, C10444) or BODIPY 581/591 C11 dye (Life Technologies, D-3861) was added to the cells and the plate was returned to the cell culture incubator for 20 min. After washing the cells with PBS twice, the cells were transferred to flow cytometry tubes and processed on the BD FACSCalibur cell analyzer. Analysis was conducted using FlowJo (Tree Star, Inc.).

Representative results of at least three independent experiments are shown.

### **BioVision MitoCapture™ Mitochondrial Apoptosis Detection Kit**

RS4;11 cells were plated at 666,000 cells per mL. Either vehicle (DMSO in water) or indicated compound was added to achieve a 100-fold dilution by addition of 30  $\mu$ L of stock solution to 3 mL of cells in media and the plate was returned to the cell culture incubator for 24 h. Trypan Blue staining and counting using a hemocytometer determined the percentage of cell death in each sample. The BioVision MitoCapture™ Mitochondrial Apoptosis Detection Kit protocol was followed using one million live cells per sample. Samples were processed on the BD FACSCalibur cell analyzer. Analysis was conducted using FlowJo (Tree Star, Inc.).

Representative results of at least three independent experiments are shown.



## **Caspase Western Blots**

Trypan Blue staining and counting using a hemocytometer determined the percentage of cell death in each sample. About one million cells were lysed in 100  $\mu$ L of 0.5% NP-40 lysis buffer also containing 50 mM Tris-HCl, 150 mM NaCl, 1 mM of PMSF, 1 mM of NaF, and protease inhibitor (GE Healthcare). The samples were incubated on ice for 15 min. The lysates were centrifuged at 12,000 rpm for 10 min at 4 °C. The protein was quantified, then subjected to electrophoresis on 9% SDS-Tris acrylamide gels and transferred to PVDF membranes. The membranes were incubated with 4% milk in PBST (0.1% tween) for 1 h, followed by incubation with a 1:500 dilution of rabbit polyclonal antibody to cleaved caspase-7 (Cell Signaling, 9491), cleaved caspase-6 (Cell Signaling, 9761), cleaved caspase-3 (Cell Signaling, 9661), or 1:5000 dilution of rabbit polyclonal antibody to  $\beta$ -Tubulin (Abcam, ab6046) overnight at 4 °C. The membranes were washed with PBST then incubated with a 1:10,000 dilution of horseradish peroxidase (HRP)-conjugated secondary antibody to mouse or rabbit (GE Healthcare) for 1 h and developed using enhanced chemiluminescence (ECL; GE Healthcare). Representative blots of three independent experiments are shown (Supplementary Figure 6).

## **Electron Microscopy**

RS4;11 cells were plated at 666,000 cells per mL. Either vehicle (DMSO in water) or FINO<sub>2</sub> was added to achieve a 10-fold dilution by addition of 800  $\mu$ L of stock solution to 8 mL of cells in media and the plate was returned to the cell culture incubator for nine, ten, eleven, twelve, or thirteen hours. Trypan Blue staining and counting using a hemocytometer determined the percentage of cell death in each sample. The eleven h time point exhibiting 22% cell death was chosen for analysis. Cells were submitted to the Microscopy Core at New York University

Langone Medical Center for processing and acquisition of transmission electron microscopy images.

## General Synthesis Procedures

Using Bruker AV-400, AV-500, or AVIII-600 spectrometers at ambient temperature,  $^1\text{H}$  NMR spectra were recorded at 400, 500, or 600 MHz, respectively and  $^{13}\text{C}$  NMR spectra were recorded at 100, 125, or 150 MHz, respectively. Chemical shifts are reported in ppm on the  $\delta$  scale, referenced to internal standard tetramethylsilane ( $\delta$  0.00) or residual solvent ( $^1\text{H}$  NMR:  $\delta$  7.26 for  $\text{CDCl}_3$  or 7.16 for  $\text{C}_6\text{D}_6$ ;  $^{13}\text{C}$  NMR:  $\delta$  77.2 for  $\text{CDCl}_3$  or 128.1 for  $\text{C}_6\text{D}_6$ ).<sup>13</sup> Infrared (IR) spectra were obtained by a Thermo Nicolet AVATAR 360 Fourier Transform Infrared Spectrometer using attenuated total reflectance (ATR). High-resolution mass spectra (HRMS) were acquired on an Agilent 6224 Accurate-Mass time-of-flight spectrometer using peak matching. Analytical thin layer chromatography was performed with Silicycle silica gel 60 Å  $\text{F}_{254}$  plates. Flash chromatography was performed using the indicated solvent system on Silicycle silica gel ( $\text{SiO}_2$ )60 (230-400 mesh). Tetrahydrofuran (THF), methylene chloride ( $\text{CH}_2\text{Cl}_2$ ), diethyl ether ( $\text{Et}_2\text{O}$ ), ethyl acetate (EtOAc) and *N,N*-dimethylformamide (DMF) were dried by filtration through alumina.<sup>14</sup> All dry reactions were run under an atmosphere of either argon or nitrogen in flame-dried glassware.

**Caution:** In general, hydrogen peroxide and organic peroxides should be handled with care. Avoid exposure to strong heat, light, mechanical shock, oxidizable organic materials, and metals. All reactions should be carried out behind a blast shield.<sup>15</sup>

## Synthesis of FINO<sub>2</sub>

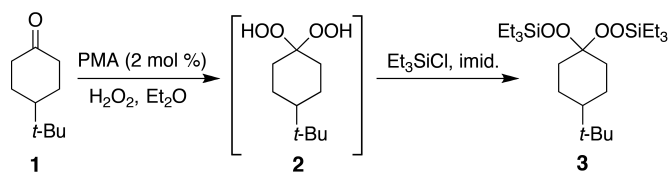

**Silylated Peroxyketal 3.** 1,1-Dihydroperoxide **2** was prepared following a literature procedure.<sup>3</sup> Etheral hydrogen peroxide was prepared (behind a blast shield) by addition of sodium chloride (NaCl, until the solution becomes saturated) to H<sub>2</sub>O<sub>2</sub> (30% aqueous solution, 90 mL). Diethyl ether (Et<sub>2</sub>O, 40 mL) was placed in a separatory funnel and it was washed with the salt-saturated aqueous peroxide solution (15 mL x 6). The etheral layer was dried over magnesium sulfate (MgSO<sub>4</sub>) and filtered directly into a flame-dried round-bottom flask. Ketone **1** (1.00 g, 6.49 mmol) and phosphomolybdic acid hydrate (PMA, 0.237 g, 0.120 mmol) were added to the etheral peroxide solution. After 3 h at ambient temperature, diethyl ether (Et<sub>2</sub>O, 25 mL) and H<sub>2</sub>O (50 mL) were added. The mixture was added to Et<sub>2</sub>O (25 mL) and the layers were separated. The aqueous layer was extracted with Et<sub>2</sub>O (3 x 40 mL). The organic layers were combined, dried over MgSO<sub>4</sub>, filtered, and concentrated under a stream of nitrogen. The unpurified product **2** exhibited spectroscopic properties consistent with those reported<sup>3</sup>: <sup>1</sup>H NMR (500 MHz, CDCl<sub>3</sub>) δ 8.51 (s, 1H), 7.70 (s, 1H), 2.32–2.28 (m, 2H), 1.73–1.71 (m, 2H), 1.48–1.41 (m, 2H), 1.29–1.21 (m, 2H), 1.09–1.03 (m, 1H), 0.87 (s, 9H).

The unpurified peroxide **2** was subjected to protection conditions<sup>2</sup> by immediate dissolution into anhydrous THF (10 mL). Imidazole (1.33 g, 19.5 mmol) was added followed by drop-wise addition over 30 min of freshly distilled triethylchlorosilane (3.30 mL, 19.5 mmol). After 72 h at ambient temperature, a saturated aqueous solution of sodium bicarbonate (35 mL) was added to the reaction mixture. The reaction mixture was then added to hexanes (50 mL) and

H<sub>2</sub>O (15 mL). The layers were separated and the aqueous layer was extracted with hexanes (50 mL). The organic layers were combined and washed with a saturated aqueous solution of sodium chloride (50 mL). The layers were separated and the aqueous layer was extracted with hexanes (3 x 75 mL). The organic layers were combined, dried over MgSO<sub>4</sub>, filtered, and concentrated under reduced pressure. Purification by flash column chromatography (100% hexanes) on Davisil<sup>®</sup> grade silica afforded triethylsilylperoxyketal **3** as a clear oil (2.09 g, 75%), whose spectroscopic data matched those reported<sup>2</sup>: <sup>1</sup>H NMR (400 MHz, C<sub>6</sub>D<sub>6</sub>) δ 2.61–2.59 (m, 2H), 1.57–1.56 (m, 2H), 1.40–1.38 (m, 4H), 1.15 (t, *J* = 8.0 Hz, 9H), 1.11 (t, *J* = 8.0 Hz, 9H), 0.87 (m, 1H), 0.86 (q, *J* = 8.0 Hz, 6H), 0.82 (s, 9H), 0.81 (q, *J* = 8.0 Hz, 6H); <sup>13</sup>C NMR (100 MHz, C<sub>6</sub>D<sub>6</sub>) δ 109.7, 47.8, 32.4, 31.1, 27.8, 24.1, 7.23, 7.22, 4.51, 4.47.

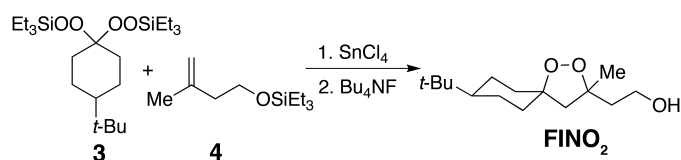

**FINO<sub>2</sub>**. The synthesis of **FINO<sub>2</sub>** followed a general procedure reported previously.<sup>2</sup> To a mixture of triethylsilylperoxyketal **3** (1.00 g, 2.31 mmol), triethyl(3-methylbut-3-enyloxy)silane **4**<sup>16</sup> (1.39 g, 6.93 mmol), and CH<sub>2</sub>Cl<sub>2</sub> (14.4 mL) was added SnCl<sub>4</sub> (4.62 mL) dropwise over 30 min at –78 °C. The reaction mixture was stirred at –10 °C for 12 h, then was warmed to –2 °C. Cold H<sub>2</sub>O (0 °C, 10 mL) was added to the reaction mixture. Potassium sodium tartrate tetrahydrate was added until the solution was saturated, and the mixture was stirred for 30 min. The reaction mixture was partitioned between Et<sub>2</sub>O (70 mL) and a saturated aqueous solution of sodium chloride (70 mL). The layers were separated and the aqueous layer was extracted with Et<sub>2</sub>O (3 x 75 mL). The organic layers were combined, dried over MgSO<sub>4</sub>, filtered, and concentrated under reduced pressure. The unpurified products were subjected immediately to deprotection

conditions<sup>17</sup> by dissolution into anhydrous THF (23.0 mL) followed by addition of tetrabutylammonium fluoride (1 M solution in THF, 3.47 mL, 3 mmol). After 17 h at ambient temperature, the reaction mixture was partitioned between a saturated aqueous solution of sodium chloride (60 mL) and Et<sub>2</sub>O (60 mL). The layers were separated and the organic layer was washed with a saturated aqueous solution of sodium chloride (60 mL). The aqueous layers were combined and extracted with Et<sub>2</sub>O (3 x 75 mL). The organic extracts were combined, dried over MgSO<sub>4</sub>, filtered, and concentrated under reduced pressure. Purification by flash column chromatography (12–25% EtOAc in hexanes) afforded **FINO<sub>2</sub>** as a white solid (0.396 g, 67%), whose spectroscopic data matched those reported<sup>2</sup>: mp 79–81 °C, lit 69–71 °C; <sup>1</sup>H NMR (600 MHz, CDCl<sub>3</sub>) δ 3.81–3.78 (m, 2H), 2.24–2.22 (d, *J* = 12.0 Hz, 1H), 2.12–2.09 (m, 3H), 2.05–2.00 (m, 2H), 1.83–1.80 (m, 1H), 1.63–1.60 (m, 2H), 1.48–1.46 (m, 1H), 1.39–1.27 (m, 3H), 1.38 (s, 3H), 0.98–0.94 (m, 1H), 0.84 (s, 9H); <sup>13</sup>C NMR (100 MHz, CDCl<sub>3</sub>) δ 85.5, 84.9, 59.5, 57.7, 47.2, 41.6, 36.2, 35.8, 32.5, 27.6, 24.5, 24.0, 23.8.

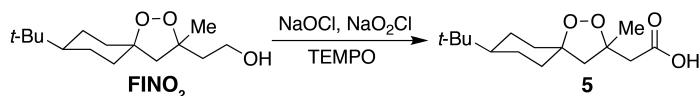

**1,2-Dioxolane 5.** A slightly modified literature procedure for oxidation of alcohols to carboxylic acids<sup>18</sup> was followed to afford **5**. A solution of **FINO<sub>2</sub>** (0.18 g, 0.70 mmol), 2,2,6,6-tetramethyl-1-piperidinyloxy (TEMPO, 0.0077 mg, 0.049 mmol), CH<sub>3</sub>CN (3.5 mL), and aqueous phosphate buffer (pH 6.7, 2.6 mL) was heated to 35 °C. Sodium chlorite (2.0 M aqueous solution, 140 μL) and sodium hypochlorite (0.045 M aqueous solution, 62 μL) were added simultaneously to the reaction mixture. After 30 min, additional sodium chlorite (2.0 M aqueous solution, 560 μL) and sodium hypochlorite (0.045 M aqueous solution, 248 μL) were added. After 24 hours, more sodium chlorite (2.0 M aqueous solution, 180 μL), sodium hypochlorite (0.045 M aqueous

solution, 25  $\mu$ L) and TEMPO (0.0015 mg, 9.6  $\mu$ mol) were added. After an additional 24 hours, the temperature was increased to 43  $^{\circ}$ C. After 4 h at 43  $^{\circ}$ C, the reaction mixture was allowed to cool to room temperature and H<sub>2</sub>O (10 mL) was added. The reaction mixture was added to a mixture of H<sub>2</sub>O (20 mL), an aqueous solution of saturated sodium chloride (5 mL), and CH<sub>2</sub>Cl<sub>2</sub> (30 mL). The layers were separated and the aqueous layer was extracted with CH<sub>2</sub>Cl<sub>2</sub> (3 x 30 mL). Purification by flash column chromatography (20% EtOAc/hexanes) on silica gel that had been pretreated with acetic acid (0.5% acetic acid/hexanes) afforded 1,2-dioxolane **5** as a white solid (0.17 g, 91%) whose spectroscopic data matched those reported<sup>2</sup>: mp 134–137  $^{\circ}$ C, lit 113–114  $^{\circ}$ C; <sup>1</sup>H NMR (600 MHz, CDCl<sub>3</sub>)  $\delta$  2.78–2.72 (dd,  $J$  = 22.8, 15.0 Hz, 2H), 2.41–2.39 (d,  $J$  = 12.6 Hz, 1H), 2.15–2.12 (m, 2H), 1.96–1.93 (m, 1H), 1.62–1.60 (m, 2H), 1.57–1.52 (td, 13.8, 4.2 Hz, 1H), 1.47 (s, 3H), 1.37–1.32 (m, 2H), 1.25–1.21 (m, 1H), 0.98–0.94 (m, 1H), 0.84 (s, 9H); <sup>13</sup>C NMR (150 MHz, CDCl<sub>3</sub>)  $\delta$  176.5, 84.9, 83.1, 56.5, 46.9, 44.0, 35.9, 35.6, 32.3, 27.4, 23.9, 23.7, 23.4.

### Preparation of Enantiomers of FINO<sub>2</sub> Using a Chiral Auxiliary

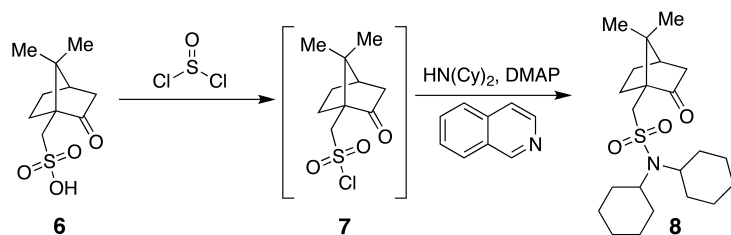

**Sulfonamide 8.** Sulfonyl chloride **7** was prepared following a literature procedure.<sup>19</sup> Freshly distilled thionyl chloride was added by syringe to (1S)-(+)-10-Camphorsulfonic acid that had been recrystallized from ethyl acetate (EtOAc). The reaction mixture was heated to 110  $^{\circ}$ C for 3 h. After the reaction mixture was cooled to room temperature, 5 mL of dry toluene was added, and the mixture was concentrated under reduced pressure. An additional 5 mL of dry toluene was

added, and the mixture was concentrated again. The spectroscopic data of sulfonyl chloride **7** matched the data reported<sup>19</sup>: <sup>1</sup>H NMR (600 MHz, CDCl<sub>3</sub>) δ 4.32–4.30 (d, *J* = 14.6 Hz, 1H), 3.74–3.71 (d, *J* = 14.6 Hz, 1H), 2.50–2.42 (m, 2H), 2.17–2.16 (m, 1H), 2.12–2.07 (m, 1H), 2.01–1.98 (d, *J* = 18.7 Hz, 1H), 1.80–1.75 (m, 1H), 1.53–1.47 (m, 1H), 1.15 (s, 3H), 0.93 (s, 3H); <sup>13</sup>C NMR (150 MHz, CDCl<sub>3</sub>) δ 212.8, 64.3, 59.7, 48.2, 42.8, 42.3, 26.9, 25.3, 19.8, 19.7.

The unpurified sulfonyl chloride **7** was immediately subjected to previously described conditions to form sulfonamide **8**.<sup>20</sup> The sulfonyl chloride was dissolved in *N,N*-dimethylformamide (DMF, 1 M, 25 mL) and cooled to 0 °C. In another flame-dried flask, 4-(dimethylamino)pyridine (0.608 g, 4.98 mmol), isoquinoline (5.77 mL, 49.8 mmol), and dicyclohexylamine (9.9 mL, 49.8 mmol) were dissolved in DMF (25 mL) and cooled to 0 °C. The sulfonyl chloride solution was added by syringe pump over 2 h to the solution of amines. After 4 h of stirring at 0 °C, 50 mL of 10% citric acid in water were added. The resulting precipitate was filtered and washed with CH<sub>2</sub>Cl<sub>2</sub> until the precipitate was white in color. The precipitate was dissolved in 50 mL of CH<sub>2</sub>Cl<sub>2</sub> and washed with water (50 mL). The aqueous layer was extracted with CH<sub>2</sub>Cl<sub>2</sub> (3 x 50 mL). The organic extracts were combined, dried over MgSO<sub>4</sub>, filtered, and concentrated under reduced pressure. Purification by flash column chromatography (12.5% EtOAc in hexanes) afforded sulfonamide **8** (5.64 g, 57%), whose spectroscopic data matched those reported<sup>20</sup>: mp 130–132 °C, lit 134–135 °C; <sup>1</sup>H NMR (600 MHz, CDCl<sub>3</sub>) δ 3.33–3.30 (d, *J* = 14.5 Hz, 1H), 2.81–2.78 (d, *J* = 14.5 Hz, 1H), 2.62–2.58 (m, 1H), 2.39–2.35 (m, 1H), 2.09–2.07 (m, 1H), 2.05–2.01 (m, 1H), 1.93 (s, 1H), 1.90 (s, 1H), 1.81–1.78 (m, 12H), 1.63–1.59 (m, 3H), 1.42–1.38 (m, 1H), 1.37–1.30 (m, 4H), 1.17 (s, 3H), 1.17–1.13 (m, 3H), 0.89 (s, 3H); <sup>13</sup>C NMR (150 MHz, CDCl<sub>3</sub>) δ 215.5, 59.0, 57.6, 52.2, 47.4, 42.9,



42.5, 32.9, 32.5, 26.8, 26.44, 26.43, 25.3, 25.2, 20.3, 19.8; HRMS (TOF MS ES+)  $m/z$  calcd for  $C_{22}H_{37}NNaO_3S$  ( $M + Na$ )<sup>+</sup> 418.2386, found 418.2396;  $[\alpha]_D^{23} +29$  ( $c$  0.41,  $CHCl_3$ ).

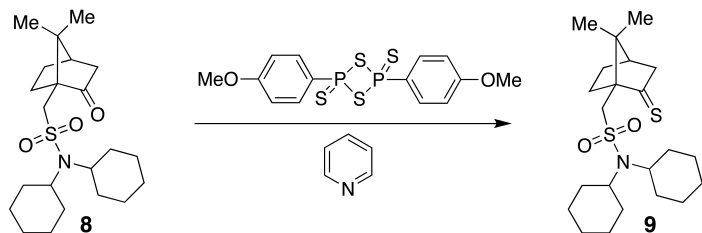

**Thione 9.** Thione **9** was prepared following a literature procedure.<sup>21</sup> Lawesson's reagent was recrystallized from toluene, and pyridine was dried over molecular sieves prior to use. A solution of sulfonamide **8** (1.22 g, 3.08 mmol), Lawesson's reagent (1.51 g, 3.72 mmol), and toluene (4.85 mL) were heated to 130 °C. After the solution started to reflux, pyridine (126  $\mu$ L, 1.57 mmol) was added by syringe. After 19 h, aqueous sodium bicarbonate (5 mL) was added to the reaction mixture. The reaction mixture was partitioned between aqueous sodium bicarbonate (40 mL) and Et<sub>2</sub>O (40 mL). The organic layer was washed with brine (40 mL). The combined aqueous layers were combined and extracted with Et<sub>2</sub>O (3 x 50 mL). The organic extracts were combined, dried over MgSO<sub>4</sub>, filtered, and concentrated under reduced pressure. Purification by flash column chromatography (7% EtOAc in hexanes) afforded thione **9** as an orange solid (0.478 g, 38%) whose spectroscopic data matched those reported<sup>21</sup>: mp 155–157 °C, lit 145–150 °C; <sup>1</sup>H NMR (400 MHz, CDCl<sub>3</sub>)  $\delta$  3.91–3.87 (d,  $J$  = 14.6 Hz, 1H), 3.35–3.32 (m, 2H), 2.92–2.89 (d,  $J$  = 14.6 Hz, 1H), 2.81–2.67 (m, 2H), 2.50–2.45 (d,  $J$  = 20.8 Hz, 1H), 2.15–2.13 (m, 1H), 2.10–2.08 (m, 1H), 1.85–1.75 (m, 12H), 1.65–1.61 (m, 2H), 1.55–1.42 (m, 2H), 1.35–1.30 (m, 3H), 1.24 (s, 3H), 1.17–1.08 (m, 2H), 1.07–0.95 (m, 1H), 0.85 (s, 3H); <sup>13</sup>C NMR (150 MHz, CDCl<sub>3</sub>)  $\delta$  265.9, 69.9, 57.6, 54.91, 54.88, 49.8, 45.0, 33.1, 32.5, 29.7, 27.0, 26.5, 25.2, 20.5, 19.8;

HRMS (TOF MS ES+)  $m/z$  calcd for  $C_{22}H_{37}NNaO_3S$  ( $M + Na$ )<sup>+</sup> 434.2163, found 434.2158;

$[\alpha]_D^{23} +147$  ( $c$  1.03,  $CHCl_3$ ).

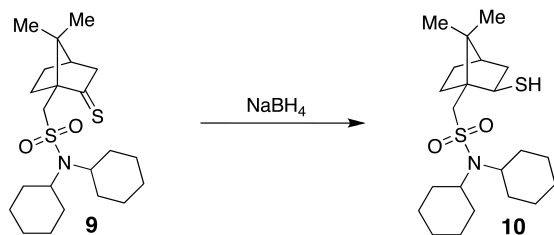

**Thiol 10.** Thiol **10** was prepared following a literature procedure.<sup>21</sup> To a cold (0 °C) solution of thione **9** (0.150 g, 0.364 mmol), tetrahydrofuran (1.79 mL, 0.204 M), and isopropanol (1.79 mL, 0.204 M) was added sodium borohydride (0.138 g, 3.64 mmol). The reaction mixture was stirred at 0 °C for 20 minutes before warming to room temperature for an additional 30 minutes. Excess sodium borohydride was quenched by drop-wise addition of 1 M HCl (aq) until bubbling stopped. The reaction mixture was partitioned between brine (30 mL) and Et<sub>2</sub>O (35 mL). The aqueous layer was extracted with Et<sub>2</sub>O (3 x 40 mL). The organic extracts were combined, dried over MgSO<sub>4</sub>, filtered, and concentrated under reduced pressure. Purification by flash column chromatography (4% EtOAc in hexanes) afforded thiol **10** as a white solid (0.1417 g, 94%) whose spectroscopic data matched those reported<sup>21</sup>: mp 122–125 °C, lit 105–110 °C; <sup>1</sup>H NMR (400 MHz, CDCl<sub>3</sub>)  $\delta$  3.74–3.71 (d,  $J$  = 13.4 Hz, 1H), 3.47–3.43 (m, 1H), 3.33–3.31 (m, 2H), 2.73–2.71 (d,  $J$  = 13.4 Hz, 1H), 2.57–2.56 (d,  $J$  = 7.5 Hz, 1H), 2.12–2.07 (m, 1H), 2.01–1.97 (m, 1H), 1.81–1.74 (m, 12H), 1.63–1.58 (m, 4H), 1.32–1.27 (m, 6H), 1.13–1.10 (m, 3H), 0.96 (s, 3H), 0.86 (s, 3H); <sup>13</sup>C NMR (100 MHz, CDCl<sub>3</sub>)  $\delta$  57.6, 55.5, 50.0, 49.7, 45.3, 44.3, 40.3, 33.6, 33.4, 32.4, 27.3, 26.6, 25.3, 21.1, 20.1; HRMS (TOF MS ES+)  $m/z$  calcd for  $C_{22}H_{40}NO_2S_2$  ( $M + H$ )<sup>+</sup> 414.2495, found 414.2491;  $[\alpha]_D^{23} +27$  ( $c$  0.51,  $CHCl_3$ ).

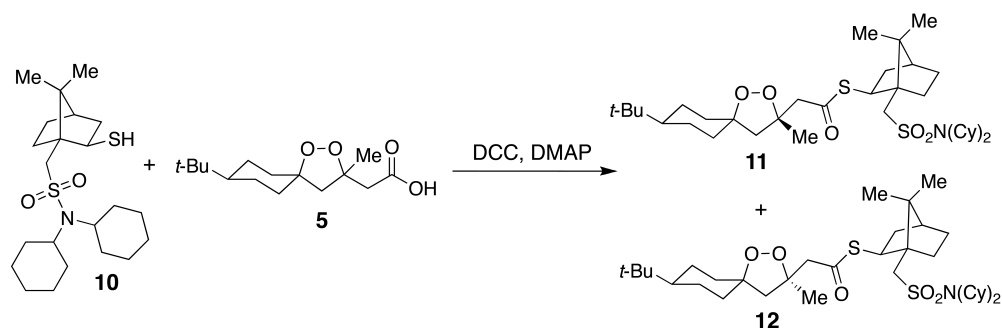

**1,2-Dioxolanes 11 and 12.** To a solution of 1,2-dioxolane **5** (0.047 g, 0.172 mmol) and CH<sub>2</sub>Cl<sub>2</sub> (866  $\mu$ L, 0.2 M) were added 4-(dimethylamino)pyridine (DMAP, 0.005 g, 0.043 mmol) and *N,N'*-dicyclohexylcarbodiimide (DCC, 0.043 g, 0.021 mmol). After 5 min, thiol **10** (0.108 g, 0.260 mmol) was added to the solution. After 90 min, the reaction mixture was diluted with CH<sub>2</sub>Cl<sub>2</sub> (10 mL), filtered through celite, and concentrated under reduced pressure. Purification by flash column chromatography (7% EtOAc in hexanes) afforded a mixture of 1,2-dioxolanes **11** and **12** as an oil (0.093 g, 80%). Further purification by flash column chromatography (15% Et<sub>2</sub>O in hexanes) afforded 1,2-dioxolane **11** (0.026 g) as the first diastereomer to elute: <sup>1</sup>H NMR (600 MHz, CDCl<sub>3</sub>)  $\delta$  4.05–4.03 (dd, *J* = 9.3, 5.2 Hz, 1H), 3.27–3.22 (m, 2H), 3.21–3.19 (d, *J* = 13.7 Hz, 1H), 3.00–2.98 (d, *J* = 14.8 Hz, 1H), 2.90–2.88 (d, *J* = 14.8 Hz, 1H), 2.73–2.71 (d, *J* = 13.7 Hz, 1H), 2.57–2.55 (d, *J* = 12.6 Hz, 1H), 2.18–2.09 (m, 4H), 1.94–1.91 (m, 1H), 1.84–1.75 (m, 17H), 1.64–1.57 (m, 4H), 1.54–1.49 (m, 1H), 1.43 (s, 1H), 1.40 (s, 2H), 1.34–1.20 (m, 7H), 1.14–1.07 (m, 2H), 0.97–0.93 (m, 1H), 0.89 (s, 3H), 0.88 (s, 3H), 0.83 (s, 9H); <sup>13</sup>C NMR (150 MHz, CDCl<sub>3</sub>, the multiplicity of resolvable carbon peaks was determined using HSQC)  $\delta$  194.2 (C), 85.0 (C), 83.6 (C), 57.4 (CH), 56.7, 55.6 (CH<sub>2</sub>), 52.9 (CH<sub>2</sub>), 50.6 (C), 49.6 (C), 48.0 (CH), 47.0, 45.5, 41.0, 36.0, 35.9, 33.8, 32.43, 32.37, 30.3, 27.5 (CH<sub>3</sub>), 27.3, 26.6, 25.3, 23.9, 23.7, 23.6, 20.6 (CH<sub>3</sub>), 20.2 (CH<sub>3</sub>); IR (ATR) 2939, 2859, 1684, 1323, 1143 cm<sup>-1</sup>; HRMS (TOF MS

ES+)  $m/z$  calcd for  $C_{37}H_{64}NO_5S_2$  ( $M + H$ )<sup>+</sup> 666.4220, found 666.4226;  $[\alpha]_D^{23} +42$  ( $c$  0.86,  $CHCl_3$ ).

1,2-Dioxolane **12** (0.0276 g) was the second product to elute:  $^1H$  NMR (600 MHz,  $CDCl_3$ )  $\delta$  4.04–4.01 (dd,  $J = 9.2, 5.2$  Hz, 1H), 3.27–3.24 (m, 2H), 3.18–3.15 (d,  $J = 13.7$  Hz, 1H), 3.00–2.98 (d,  $J = 14.5$  Hz, 1H), 2.86–2.84 (d,  $J = 14.5$  Hz, 1H), 2.72–2.69 (d,  $J = 13.7$  Hz, 1H), 2.48–2.46 (d,  $J = 12.5$  Hz, 1H), 2.19–2.07 (m, 4H), 1.95–1.93 (m, 1H), 1.83–1.74 (m, 17H), 1.63–1.58 (m, 4H), 1.55–1.49 (m, 1H), 1.46 (s, 2H) 1.43 (s, 1H), 1.33–1.21 (m, 7H), 1.13–1.06 (m, 2H), 0.98–0.93 (m, 1H), 0.90 (s, 3H), 0.89 (s, 3H), 0.83 (s, 9H);  $^{13}C$  NMR (150 MHz,  $CDCl_3$ , the multiplicity of resolvable carbon peaks was determined using HSQC)  $\delta$  194.3 (C), 84.9 (C), 83.8 (C), 57.3 (CH), 56.2, 55.6 (CH<sub>2</sub>), 52.9 (CH<sub>2</sub>), 50.4 (C), 49.6 (C), 48.1 (CH), 47.0, 45.5, 41.1, 36.0, 35.8, 33.9, 33.3, 32.4, 32.3, 30.3, 27.5 (CH<sub>3</sub>), 27.4, 26.5, 26.5, 25.2, 24.2, 23.9, 23.6, 20.6 (CH<sub>3</sub>), 20.2 (CH<sub>3</sub>); IR (ATR) 2938, 2856, 1688, 1322, 1142  $cm^{-1}$ ; HRMS (TOF MS ES+)  $m/z$  calcd for  $C_{37}H_{64}NO_5S_2$  ( $M + H$ )<sup>+</sup> 666.4220, found 666.4222;  $[\alpha]_D^{23} +15$  ( $c$  1.2,  $CHCl_3$ ). Both **11** and **12** were oils when concentrated under reduced pressure; however, slow evaporation at 0 °C of a solution of **11** in hexanes provided crystalline material of sufficient quality for X-ray crystallography (see below).

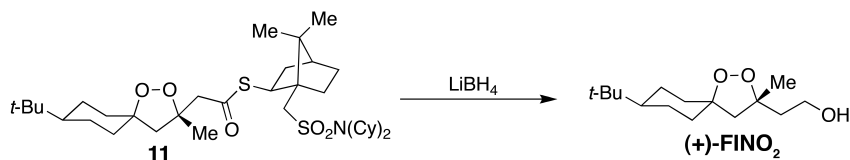

(+)-**FINO**<sub>2</sub>. Conditions to reduce an ethyl ester in the presence of a 1,2-dioxane<sup>22</sup> were slightly modified to provide (+)-**FINO**<sub>2</sub>. To a cooled (0 °C) solution of 1,2-dioxolane **11** (0.090 g, 0.135 mmol) in Et<sub>2</sub>O (2.7 mL, 0.05 M) was added lithium borohydride (LiBH<sub>4</sub>, 0.009 g, 0.406 mmol). After 20 minutes at 0 °C, the reaction mixture was allowed to warm to room temperature. After

24 h, the excess LiBH<sub>4</sub> was quenched at 0 °C with saturated aqueous ammonium chloride (1 mL). The reaction mixture was partitioned between water (15 mL) and EtOAc (15 mL). The organic layer was washed with brine (20 mL). The aqueous layers were combined and extracted with Et<sub>2</sub>O (3 x 40 mL). The organic extracts were combined, dried over MgSO<sub>4</sub>, filtered, and concentrated under reduced pressure. Purification by flash column chromatography (12–20% EtOAc in hexanes) afforded (+)-**FINO**<sub>2</sub> as a white solid (0.022 g, 62%) whose spectroscopic data matched those reported:  $[\alpha]_D^{23} +32$  (*c* 0.60, CHCl<sub>3</sub>).

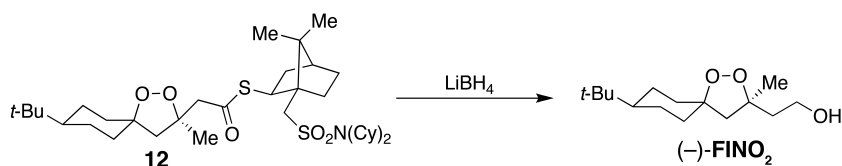

(-)-**FINO**<sub>2</sub>. Conditions to reduce an ethyl ester in the presence of a 1,2-dioxane<sup>22</sup> were slightly modified to provide (-)-**FINO**<sub>2</sub>. To a cooled (0 °C) solution of 1,2-dioxolane **12** (0.090 g, 0.135 mmol) in Et<sub>2</sub>O (2.7 mL, 0.05 M) was added lithium borohydride (LiBH<sub>4</sub>, 0.009 g, 0.406 mmol). After 15 minutes at 0 °C, the reaction mixture was allowed to warm to room temperature. After 24 h, the excess LiBH<sub>4</sub> was quenched at 0 °C with saturated aqueous ammonium chloride (1 mL). The reaction mixture was partitioned between water (15 mL) and EtOAc (15 mL). The organic layer was washed with brine (20 mL). The aqueous layers were combined and extracted with Et<sub>2</sub>O (3 x 40 mL). The organic extracts were combined, dried over MgSO<sub>4</sub>, filtered, and concentrated under reduced pressure. Purification by flash column chromatography (12–30% EtOAc in hexanes) afforded (-)-**FINO**<sub>2</sub> as a white solid (0.018 g, 51%) whose spectroscopic data matched those reported: with the following optical rotation  $[\alpha]_D^{23} -38$  (*c* 0.62, CHCl<sub>3</sub>).

## X-ray Crystallographic Data

X-ray Data Collection, Structure Solution and Refinement for 1,2-Dioxolane **11**.

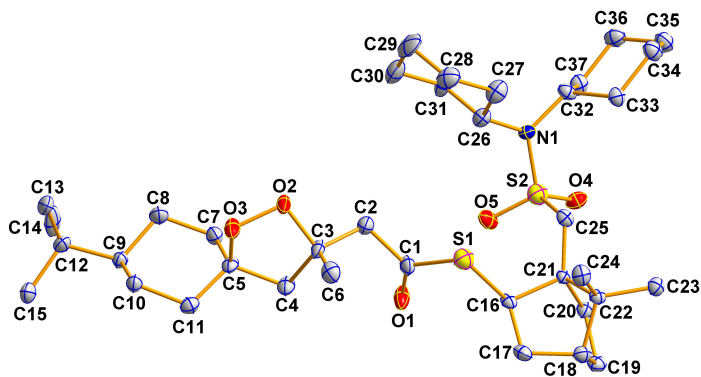

The molecular structure of dioxolane **11**. The H atoms are omitted for clarity.

A colorless needle-like crystal with the size of  $0.02 \cdot 0.04 \cdot 0.54 \text{ mm}^3$  was selected for geometry and intensity data collection with a Bruker SMART APEXII CCD area detector on a D8 goniometer at 100 K. The temperature during the data collection was controlled with an Oxford Cryosystems Series 700+ instrument. Preliminary lattice parameters and orientation matrices were obtained from three sets of frames. Data were collected using graphite-monochromated and 0.5 mm-MonoCap-collimated Mo-K $\alpha$  radiation ( $\lambda = 0.71073 \text{ \AA}$ ) with the  $\omega$  scan method <sup>[1]</sup>. Data were processed with the INTEGRATE program of the APEX2 software <sup>[1]</sup> for reduction and cell refinement. Multi-scan absorption corrections were applied by using the SCALE program for the area detector. The structure was solved by the direct method and refined on  $F^2$  (SHELXTL) <sup>[2]</sup>. Non-hydrogen atoms were refined with anisotropic displacement parameters, and hydrogen atoms on carbons were placed in idealized positions ( $C-H = 0.98\text{-}1.00 \text{ \AA}$ ) and included as riding with  $U_{\text{iso}}(H) = 1.2$  or  $1.5 U_{\text{eq}}(\text{non-H})$ .

## References.

[1] APEX2 (version 2012.10). *Program for Bruker CCD X-ray Diffractometer Control*, Bruker AXS Inc., Madison, WI, 2012.

[2] G. M. Sheldrick, SHELXTL, version 6.14. *Program for solution and refinement of crystal structures*, Universität Göttingen, Germany, 2009.

## Sample and Crystal Data

Chemical formula:  $C_{37}H_{63}NO_5S_2$   
Formula weight: 666.03  
Temperature: 100(2) K  
Wavelength: 0.71073 Å  
Crystal size: 0.020 x 0.040 x 0.540 mm  
Crystal habit: colorless needle  
Crystal system: orthorhombic  
Space group: P 21 21 21  
Unit cell dimensions:  
a = 6.5242(7) Å;  $\alpha = 90^\circ$   
b = 18.975(2) Å;  $\beta = 90^\circ$   
c = 29.829(3) Å;  $\gamma = 90^\circ$   
Volume: 3692.7(7) Å<sup>3</sup>  
Z: 4  
Density (calculated): 1.198 g/cm<sup>3</sup>  
Absorption coefficient: 0.185 mm<sup>-1</sup>  
F(000): 1456

## Data Collection and Structure Refinement

Diffractometer: Bruker APEX-II CCD  
Radiation source: sealed tube, MoK $\alpha$   
Theta range for data collection: 1.27 to 26.37°  
Index ranges:  $-7 \leq h \leq 8$ ,  $-23 \leq k \leq 23$ ,  $-36 \leq l \leq 37$   
Reflections collected: 30801  
Independent reflections: 7524 [R(int) = 0.0877]  
Absorption correction: multi-scan  
Max. and min. transmission: 0.9963 and 0.9065  
Structure solution technique: direct methods  
Structure solution program: SHELXS-97 (Sheldrick, 2008)  
Refinement method: Full-matrix least-squares on F<sup>2</sup>  
Refinement program: SHELXL-97 (Sheldrick, 2008)  
Function minimized:  $\Sigma w(F_o^2 - F_c^2)^2$

Data / restraints / parameters: 7524 / 0 / 413

Goodness-of-fit on F2: 1.036

$\Delta/\sigma_{\text{max}}$ : 0.001

Final R indices: 5683 data;  $I > 2\sigma(I)$ ;  $R1 = 0.0503$ ,  $wR2 = 0.1008$

all data:  $R1 = 0.0792$ ,  $wR2 = 0.1117$

Weighting scheme:  $w = 1/[\sigma^2(F_o^2) + (0.0489P)^2 + 0.0000P]$

where  $P = (F_o^2 + 2F_c^2)/3$

Absolute structure parameter: 0.0(1)

Largest diff. peak and hole: 0.226 and -0.371  $\text{e}\text{\AA}^{-3}$

R.M.S. deviation from mean: 0.056  $\text{e}\text{\AA}^{-3a}$

### Atomic coordinates and equivalent isotropic atomic displacement parameters ( $\text{\AA}^2$ ):

$U(\text{eq})$  is defined as one third of the trace of the orthogonalized  $U_{ij}$  tensor.

|     | x/a         | y/b         | z/c         | $U(\text{eq})$ |
|-----|-------------|-------------|-------------|----------------|
| S1  | 0.31155(12) | 0.60129(4)  | 0.47390(3)  | 0.02229(19)    |
| S2  | 0.40087(12) | 0.53423(4)  | 0.35323(3)  | 0.01863(17)    |
| O1  | 0.7114(3)   | 0.58204(13) | 0.48444(8)  | 0.0345(6)      |
| O2  | 0.5158(3)   | 0.42777(12) | 0.58384(7)  | 0.0290(6)      |
| O3  | 0.6349(3)   | 0.42529(11) | 0.62540(7)  | 0.0283(5)      |
| O4  | 0.4609(3)   | 0.55196(11) | 0.30823(7)  | 0.0249(5)      |
| O5  | 0.5565(3)   | 0.53002(11) | 0.38713(7)  | 0.0268(5)      |
| N1  | 0.2795(4)   | 0.45925(12) | 0.35180(8)  | 0.0183(5)      |
| C1  | 0.5418(5)   | 0.55989(17) | 0.49172(10) | 0.0231(7)      |
| C2  | 0.5042(5)   | 0.49223(16) | 0.51776(10) | 0.0241(7)      |
| C3  | 0.5558(5)   | 0.49850(16) | 0.56717(10) | 0.0212(7)      |
| C4  | 0.7843(5)   | 0.50910(17) | 0.57750(11) | 0.0247(8)      |
| C5  | 0.8364(4)   | 0.45085(15) | 0.61134(10) | 0.0206(7)      |
| C6  | 0.4190(5)   | 0.55116(17) | 0.59070(10) | 0.0272(8)      |
| C7  | 0.9580(5)   | 0.39065(17) | 0.59032(10) | 0.0238(7)      |
| C8  | 0.0158(5)   | 0.33314(16) | 0.62365(10) | 0.0256(8)      |
| C9  | 0.1332(5)   | 0.36390(15) | 0.66372(9)  | 0.0183(7)      |
| C10 | 0.9933(5)   | 0.41801(15) | 0.68674(9)  | 0.0201(7)      |
| C11 | 0.9380(5)   | 0.47723(16) | 0.65420(10) | 0.0221(7)      |
| C12 | 0.2227(5)   | 0.30788(15) | 0.69618(10) | 0.0230(7)      |
| C13 | 0.0560(6)   | 0.26720(18) | 0.72064(11) | 0.0339(9)      |
| C14 | 0.3594(7)   | 0.25702(19) | 0.66968(12) | 0.0424(11)     |
| C15 | 0.3588(5)   | 0.34437(17) | 0.73091(11) | 0.0267(8)      |
| C16 | 0.4138(5)   | 0.66600(15) | 0.43471(9)  | 0.0166(6)      |
| C17 | 0.3983(5)   | 0.74374(16) | 0.45087(10) | 0.0222(7)      |
| C18 | 0.3054(5)   | 0.78138(16) | 0.41031(10) | 0.0213(7)      |
| C19 | 0.4670(5)   | 0.78186(16) | 0.37291(10) | 0.0216(7)      |
| C20 | 0.4670(4)   | 0.70359(15) | 0.35675(10) | 0.0182(7)      |
| C21 | 0.3067(4)   | 0.66801(14) | 0.38786(9)  | 0.0141(6)      |



|     |           |             |             |            |
|-----|-----------|-------------|-------------|------------|
| C22 | 0.1450(4) | 0.72793(15) | 0.39327(9)  | 0.0164(6)  |
| C23 | 0.0418(5) | 0.75050(16) | 0.34924(10) | 0.0206(7)  |
| C24 | 0.9751(5) | 0.71122(17) | 0.42706(10) | 0.0229(7)  |
| C25 | 0.2174(4) | 0.59891(15) | 0.37085(10) | 0.0174(6)  |
| C26 | 0.2351(5) | 0.42539(16) | 0.39574(10) | 0.0228(7)  |
| C27 | 0.0075(5) | 0.42234(18) | 0.40725(11) | 0.0292(8)  |
| C28 | 0.9723(6) | 0.38755(18) | 0.45286(11) | 0.0330(9)  |
| C29 | 0.0748(7) | 0.31544(19) | 0.45584(12) | 0.0424(10) |
| C30 | 0.3004(6) | 0.31891(19) | 0.44398(11) | 0.0379(9)  |
| C31 | 0.3366(6) | 0.35353(16) | 0.39867(10) | 0.0272(8)  |
| C32 | 0.1660(5) | 0.43423(16) | 0.31161(10) | 0.0211(7)  |
| C33 | 0.9914(5) | 0.48193(16) | 0.29678(10) | 0.0213(7)  |
| C34 | 0.8706(5) | 0.44820(17) | 0.25901(10) | 0.0267(8)  |
| C35 | 0.0042(5) | 0.42609(18) | 0.22041(11) | 0.0285(8)  |
| C36 | 0.1800(5) | 0.37962(16) | 0.23494(10) | 0.0255(7)  |
| C37 | 0.3042(5) | 0.41394(17) | 0.27299(10) | 0.0247(7)  |

**Bond lengths (Å):**

|          |           |          |          |
|----------|-----------|----------|----------|
| S1-C1    | 1.776(3)  | S1-C16   | 1.822(3) |
| S2-O5    | 1.435(2)  | S2-O4    | 1.438(2) |
| S2-N1    | 1.629 (2) | S2-C25   | 1.793(3) |
| O1-C1    | 1.204(4)  | O2-C3    | 1.455(4) |
| O2-O3    | 1.464(3)  | O3-C5    | 1.462(3) |
| N1-C32   | 1.487(4)  | N1-C26   | 1.488(4) |
| C1-C2    | 1.521(4)  | C2-C3    | 1.516(4) |
| C2-H2A   | 0.99      | C2-H2B   | 0.99     |
| C3-C6    | 1.512(4)  | C3-C4    | 1.535(4) |
| C4-C5    | 1.535(4)  | C4-H4A   | 0.99     |
| C4-H4B   | 0.99      | C5-C11   | 1.525(4) |
| C5-C7    | 1.526(4)  | C6-H6A   | 0.98     |
| C6-H6B   | 0.98      | C6-H6C   | 0.98     |
| C7-C8    | 1.523(4)  | C7-H7A   | 0.99     |
| C7-H7B   | 0.99      | C8-C9    | 1.535(4) |
| C8-H8A   | 0.99      | C8-H8B   | 0.99     |
| C9-C10   | 1.536(4)  | C9-C12   | 1.552(4) |
| C9-H9    | 1         | C10-C11  | 1.528(4) |
| C10-H10A | 0.99      | C10-H10B | 0.99     |
| C11-H11A | 0.99      | C11-H11B | 0.99     |
| C12-C13  | 1.520(5)  | C12-C15  | 1.530(4) |
| C12-C14  | 1.533(5)  | C13-H13A | 0.98     |
| C13-H13B | 0.98      | C13-H13C | 0.98     |
| C14-H14A | 0.98      | C14-H14B | 0.98     |
| C14-H14C | 0.98      | C15-H15A | 0.98     |
| C15-H15B | 0.98      | C15-H15C | 0.98     |
| C16-C17  | 1.555(4)  | C16-C21  | 1.563(4) |

|          |          |          |          |
|----------|----------|----------|----------|
| C16-H16  | 1        | C17-C18  | 1.530(4) |
| C17-H17A | 0.99     | C17-H17B | 0.99     |
| C18-C19  | 1.535(4) | C18-C22  | 1.543(4) |
| C18-H18  | 1        | C19-C20  | 1.562(4) |
| C19-H19A | 0.99     | C19-H19B | 0.99     |
| C20-C21  | 1.553(4) | C20-H20A | 0.99     |
| C20-H20B | 0.99     | C21-C25  | 1.522(4) |
| C21-C22  | 1.560(4) | C22-C24  | 1.531(4) |
| C22-C23  | 1.537(4) | C23-H23A | 0.98     |
| C23-H23B | 0.98     | C23-H23C | 0.98     |
| C24-H24A | 0.98     | C24-H24B | 0.98     |
| C24-H24C | 0.98     | C25-H25A | 0.99     |
| C25-H25B | 0.99     | C26-C31  | 1.518(4) |
| C26-C27  | 1.525(4) | C26-H26  | 1        |
| C27-C28  | 1.530(4) | C27-H27A | 0.99     |
| C27-H27B | 0.99     | C28-C29  | 1.526(5) |
| C28-H28A | 0.99     | C28-H28B | 0.99     |
| C29-C30  | 1.515(6) | C29-H29A | 0.99     |
| C29-H29B | 0.99     | C30-C31  | 1.521(4) |
| C30-H30A | 0.99     | C30-H30B | 0.99     |
| C31-H31A | 0.99     | C31-H31B | 0.99     |
| C32-C37  | 1.512(4) | C32-C33  | 1.521(4) |
| C32-H32  | 1        | C33-C34  | 1.516(4) |
| C33-H33A | 0.99     | C33-H33B | 0.99     |
| C34-C35  | 1.504(4) | C34-H34A | 0.99     |
| C34-H34B | 0.99     | C35-C36  | 1.510(4) |
| C35-H35A | 0.99     | C35-H35B | 0.99     |
| C36-C37  | 1.539(4) | C36-H36A | 0.99     |
| C36-H36B | 0.99     | C37-H37A | 0.99     |
| C37-H37B | 0.99     |          |          |

**Bond angles (°):**

|            |            |            |            |
|------------|------------|------------|------------|
| C1-S1-C16  | 100.39(15) |            |            |
| O5-S2-O4   | 118.56(13) |            |            |
| O5-S2-N1   | 108.28(13) | O4-S2-N1   | 108.19(13) |
| O5-S2-C25  | 107.69(13) | O4-S2-C25  | 107.17(13) |
| N1-S2-C25  | 106.33(14) | C3-O2-O3   | 102.9(2)   |
| C5-O3-O2   | 102.92(18) | C32-N1-C26 | 118.4(2)   |
| C32-N1-S2  | 122.83(19) | C26-N1-S2  | 116.7(2)   |
| O1-C1-C2   | 122.4(3)   | O1-C1-S1   | 124.7(2)   |
| C2-C1-S1   | 113.0(2)   | C3-C2-C1   | 113.2(3)   |
| C3-C2-H2A  | 108.9      | C1-C2-H2A  | 108.9      |
| C3-C2-H2B  | 108.9      | C1-C2-H2B  | 108.9      |
| H2A-C2-H2B | 107.7      | O2-C3-C6   | 110.2(2)   |
| O2-C3-C2   | 102.7(2)   | C6-C3-C2   | 111.8(3)   |

|               |          |               |          |
|---------------|----------|---------------|----------|
| O2-C3-C4      | 103.1(2) | C6-C3-C4      | 113.1(3) |
| C2-C3-C4      | 114.9(3) | C5-C4-C3      | 104.6(2) |
| C5-C4-H4A     | 110.8    | C3-C4-H4A     | 110.8    |
| C5-C4-H4B     | 110.8    | C3-C4-H4B     | 110.8    |
| H4A-C4-H4B    | 108.9    | O3-C5-C11     | 105.0(2) |
| O3-C5-C7      | 109.7(2) | C11-C5-C7     | 111.3(2) |
| O3-C5-C4      | 103.2(2) | C11-C5-C4     | 114.3(3) |
| C7-C5-C4      | 112.6(2) | C3-C6-H6A     | 109.5    |
| C3-C6-H6B     | 109.5    | H6A-C6-H6B    | 109.5    |
| C3-C6-H6C     | 109.5    | H6A-C6-H6C    | 109.5    |
| H6B-C6-H6C    | 109.5    | C8-C7-C5      | 113.4(2) |
| C8-C7-H7A     | 108.9    | C5-C7-H7A     | 108.9    |
| C8-C7-H7B     | 108.9    | C5-C7-H7B     | 108.9    |
| H7A-C7-H7B    | 107.7    | C7-C8-C9      | 111.0(2) |
| C7-C8-H8A     | 109.4    | C9-C8-H8A     | 109.4    |
| C7-C8-H8B     | 109.4    | C9-C8-H8B     | 109.4    |
| H8A-C8-H8B    | 108      | C8-C9-C10     | 107.8(2) |
| C8-C9-C12     | 114.4(2) | C10-C9-C12    | 113.7(2) |
| C8-C9-H9      | 106.8    | C10-C9-H9     | 106.8    |
| C12-C9-H9     | 106.8    | C11-C10-C9    | 110.3(2) |
| C11-C10-H10A  | 109.6    | C9-C10-H10A   | 109.6    |
| C11-C10-H10B  | 109.6    | C9-C10-H10B   | 109.6    |
| H10A-C10-H10B | 108.1    | C5-C11-C10    | 113.2(2) |
| C5-C11-H11A   | 108.9    | C10-C11-H11A  | 108.9    |
| C5-C11-H11B   | 108.9    | C10-C11-H11B  | 108.9    |
| H11A-C11-H11B | 107.8    | C13-C12-C15   | 108.7(3) |
| C13-C12-C14   | 110.1(3) | C15-C12-C14   | 107.3(3) |
| C13-C12-C9    | 112.2(3) | C15-C12-C9    | 109.3(2) |
| C14-C12-C9    | 109.2(2) | C12-C13-H13A  | 109.5    |
| C12-C13-H13B  | 109.5    | H13A-C13-H13B | 109.5    |
| C12-C13-H13C  | 109.5    | H13A-C13-H13C | 109.5    |
| H13B-C13-H13C | 109.5    | C12-C14-H14A  | 109.5    |
| C12-C14-H14B  | 109.5    | H14A-C14-H14B | 109.5    |
| C12-C14-H14C  | 109.5    | H14A-C14-H14C | 109.5    |
| H14B-C14-H14C | 109.5    | C12-C15-H15A  | 109.5    |
| C12-C15-H15B  | 109.5    | H15A-C15-H15B | 109.5    |
| C12-C15-H15C  | 109.5    | H15A-C15-H15C | 109.5    |
| H15B-C15-H15C | 109.5    | C17-C16-C21   | 103.0(2) |
| C17-C16-S1    | 114.6(2) | C21-C16-S1    | 115.2(2) |
| C17-C16-H16   | 107.9    | C21-C16-H16   | 107.9    |
| S1-C16-H16    | 107.9    | C18-C17-C16   | 102.9(2) |
| C18-C17-H17A  | 111.2    | C16-C17-H17A  | 111.2    |
| C18-C17-H17B  | 111.2    | C16-C17-H17B  | 111.2    |
| H17A-C17-H17B | 109.1    | C17-C18-C19   | 107.8(3) |
| C17-C18-C22   | 102.8(2) | C19-C18-C22   | 103.3(2) |
| C17-C18-H18   | 113.9    | C19-C18-H18   | 113.9    |

|               |          |               |          |
|---------------|----------|---------------|----------|
| C22-C18-H18   | 113.9    | C18-C19-C20   | 102.6(2) |
| C18-C19-H19A  | 111.2    | C20-C19-H19A  | 111.2    |
| C18-C19-H19B  | 111.2    | C20-C19-H19B  | 111.2    |
| H19A-C19-H19B | 109.2    | C21-C20-C19   | 103.2(2) |
| C21-C20-H20A  | 111.1    | C19-C20-H20A  | 111.1    |
| C21-C20-H20B  | 111.1    | C19-C20-H20B  | 111.1    |
| H20A-C20-H20B | 109.1    | C25-C21-C20   | 115.7(2) |
| C25-C21-C22   | 113.8(2) | C20-C21-C22   | 101.6(2) |
| C25-C21-C16   | 116.6(2) | C20-C21-C16   | 104.1(2) |
| C22-C21-C16   | 103.2(2) | C24-C22-C23   | 107.6(2) |
| C24-C22-C18   | 114.2(2) | C23-C22-C18   | 113.3(2) |
| C24-C22-C21   | 114.0(2) | C23-C22-C21   | 114.3(2) |
| C18-C22-C21   | 93.1(2)  | C22-C23-H23A  | 109.5    |
| C22-C23-H23B  | 109.5    | H23A-C23-H23B | 109.5    |
| C22-C23-H23C  | 109.5    | H23A-C23-H23C | 109.5    |
| H23B-C23-H23C | 109.5    | C22-C24-H24A  | 109.5    |
| C22-C24-H24B  | 109.5    | H24A-C24-H24B | 109.5    |
| C22-C24-H24C  | 109.5    | H24A-C24-H24C | 109.5    |
| H24B-C24-H24C | 109.5    | C21-C25-S2    | 115.6(2) |
| C21-C25-H25A  | 108.4    | S2-C25-H25A   | 108.4    |
| C21-C25-H25B  | 108.4    | S2-C25-H25B   | 108.4    |
| H25A-C25-H25B | 107.4    | N1-C26-C31    | 110.7(3) |
| N1-C26-C27    | 113.8(3) | C31-C26-C27   | 112.2(3) |
| N1-C26-H26    | 106.5    | C31-C26-H26   | 106.5    |
| C27-C26-H26   | 106.5    | C26-C27-C28   | 111.3(3) |
| C26-C27-H27A  | 109.4    | C28-C27-H27A  | 109.4    |
| C26-C27-H27B  | 109.4    | C28-C27-H27B  | 109.4    |
| H27A-C27-H27B | 108      | C29-C28-C27   | 111.9(3) |
| C29-C28-H28A  | 109.2    | C27-C28-H28A  | 109.2    |
| C29-C28-H28B  | 109.2    | C27-C28-H28B  | 109.2    |
| H28A-C28-H28B | 107.9    | C30-C29-C28   | 111.9(3) |
| C30-C29-H29A  | 109.2    | C28-C29-H29A  | 109.2    |
| C30-C29-H29B  | 109.2    | C28-C29-H29B  | 109.2    |
| H29A-C29-H29B | 107.9    | C29-C30-C31   | 112.2(3) |
| C29-C30-H30A  | 109.2    | C31-C30-H30A  | 109.2    |
| C29-C30-H30B  | 109.2    | C31-C30-H30B  | 109.2    |
| H30A-C30-H30B | 107.9    | C26-C31-C30   | 111.8(3) |
| C26-C31-H31A  | 109.3    | C30-C31-H31A  | 109.3    |
| C26-C31-H31B  | 109.3    | C30-C31-H31B  | 109.3    |
| H31A-C31-H31B | 107.9    | N1-C32-C37    | 113.5(2) |
| N1-C32-C33    | 114.7(2) | C37-C32-C33   | 112.1(2) |
| N1-C32-H32    | 105.1    | C37-C32-H32   | 105.1    |
| C33-C32-H32   | 105.1    | C34-C33-C32   | 110.7(2) |
| C34-C33-H33A  | 109.5    | C32-C33-H33A  | 109.5    |
| C34-C33-H33B  | 109.5    | C32-C33-H33B  | 109.5    |
| H33A-C33-H33B | 108.1    | C35-C34-C33   | 112.7(3) |

|               |       |              |          |
|---------------|-------|--------------|----------|
| C35-C34-H34A  | 109.1 | C33-C34-H34A | 109.1    |
| C35-C34-H34B  | 109.1 | C33-C34-H34B | 109.1    |
| H34A-C34-H34B | 107.8 | C34-C35-C36  | 112.5(3) |
| C34-C35-H35A  | 109.1 | C36-C35-H35A | 109.1    |
| C34-C35-H35B  | 109.1 | C36-C35-H35B | 109.1    |
| H35A-C35-H35B | 107.8 | C35-C36-C37  | 111.4(3) |
| C35-C36-H36A  | 109.4 | C37-C36-H36A | 109.4    |
| C35-C36-H36B  | 109.4 | C37-C36-H36B | 109.4    |
| H36A-C36-H36B | 108   | C32-C37-C36  | 110.8(3) |
| C32-C37-H37A  | 109.5 | C36-C37-H37A | 109.5    |
| C32-C37-H37B  | 109.5 | C36-C37-H37B | 109.5    |
| H37A-C37-H37B | 108.1 |              |          |

### Anisotropic atomic displacement parameters ( $\text{\AA}^2$ ):

The anisotropic atomic displacement factor exponent takes the form:  $-2\pi^2[ h^2 a^2 U_{11} + \dots + 2 h k a^* b^* U_{12} ]$

|     | U11        | U22        | U33        | U23         | U13         | U12         |
|-----|------------|------------|------------|-------------|-------------|-------------|
| S1  | 0.0167(4)  | 0.0293(4)  | 0.0209(4)  | 0.0076(3)   | 0.0003(4)   | 0.0012(4)   |
| S2  | 0.0144(4)  | 0.0173(4)  | 0.0242(4)  | 0.0005(3)   | 0.0010(3)   | 0.0005(3)   |
| O1  | 0.0193(12) | 0.0461(16) | 0.0381(14) | 0.0239(12)  | -0.0070(11) | -0.0075(11) |
| O2  | 0.0235(12) | 0.0317(13) | 0.0318(13) | 0.0184(10)  | -0.0114(11) | -0.0106(11) |
| O3  | 0.0188(12) | 0.0360(13) | 0.0300(12) | 0.0170(10)  | -0.0048(10) | -0.0086(10) |
| O4  | 0.0245(12) | 0.0208(12) | 0.0295(12) | 0.0011(10)  | 0.0076(10)  | -0.0023(10) |
| O5  | 0.0172(12) | 0.0267(12) | 0.0364(13) | -0.0061(10) | -0.0079(10) | 0.0059(10)  |
| N1  | 0.0204(13) | 0.0141(13) | 0.0204(13) | -0.0004(11) | 0.0011(11)  | -0.0024(11) |
| C1  | 0.0230(17) | 0.0287(18) | 0.0175(15) | 0.0066(14)  | -0.0031(14) | -0.0018(15) |
| C2  | 0.0254(18) | 0.0214(17) | 0.0255(17) | 0.0051(14)  | -0.0044(15) | -0.0011(14) |
| C3  | 0.0178(17) | 0.0214(17) | 0.0245(17) | 0.0121(14)  | -0.0009(14) | -0.0009(13) |
| C4  | 0.0180(17) | 0.0280(18) | 0.0282(18) | 0.0094(14)  | -0.0014(14) | -0.0047(14) |
| C5  | 0.0153(15) | 0.0213(17) | 0.0251(17) | 0.0081(13)  | -0.0003(13) | -0.0050(13) |
| C6  | 0.0243(18) | 0.035(2)   | 0.0219(17) | 0.0021(14)  | 0.0028(15)  | -0.0022(16) |
| C7  | 0.0257(18) | 0.0257(18) | 0.0200(16) | 0.0016(14)  | -0.0042(14) | -0.0034(15) |
| C8  | 0.0318(19) | 0.0199(17) | 0.0251(17) | -0.0024(14) | -0.0042(15) | 0.0015(15)  |
| C9  | 0.0199(17) | 0.0167(16) | 0.0184(15) | 0.0011(12)  | -0.0011(13) | 0.0025(13)  |
| C10 | 0.0220(16) | 0.0196(17) | 0.0188(15) | 0.0011(13)  | -0.0016(14) | 0.0020(14)  |
| C11 | 0.0211(17) | 0.0205(17) | 0.0245(17) | 0.0003(13)  | 0.0020(14)  | -0.0008(14) |
| C12 | 0.0290(18) | 0.0162(16) | 0.0239(16) | 0.0009(13)  | -0.0035(15) | 0.0016(14)  |
| C13 | 0.047(2)   | 0.0247(19) | 0.0304(18) | 0.0115(15)  | -0.0151(18) | -0.0085(17) |
| C14 | 0.058(3)   | 0.037(2)   | 0.0322(19) | -0.0019(16) | -0.0109(19) | 0.032(2)    |
| C15 | 0.027(2)   | 0.0243(17) | 0.0285(18) | 0.0036(14)  | -0.0067(15) | 0.0042(15)  |
| C16 | 0.0126(15) | 0.0217(16) | 0.0157(15) | 0.0010(12)  | 0.0004(13)  | -0.0042(14) |
| C17 | 0.0207(16) | 0.0250(17) | 0.0209(15) | -0.0041(13) | -0.0021(15) | -0.0062(15) |
| C18 | 0.0195(16) | 0.0187(16) | 0.0257(17) | -0.0017(13) | -0.0011(15) | 0.0001(15)  |

|     |            |            |            |             |             |             |
|-----|------------|------------|------------|-------------|-------------|-------------|
| C19 | 0.0173(16) | 0.0212(17) | 0.0264(17) | 0.0007(14)  | -0.0007(14) | -0.0039(14) |
| C20 | 0.0149(15) | 0.0197(16) | 0.0200(15) | 0.0025(13)  | -0.0005(13) | -0.0006(13) |
| C21 | 0.0112(14) | 0.0152(15) | 0.0159(14) | 0.0013(12)  | -0.0011(13) | -0.0007(13) |
| C22 | 0.0128(16) | 0.0165(15) | 0.0197(15) | -0.0005(12) | 0.0000(12)  | -0.0006(12) |
| C23 | 0.0176(16) | 0.0216(17) | 0.0227(16) | 0.0013(14)  | 0.0006(14)  | 0.0017(13)  |
| C24 | 0.0195(17) | 0.0276(18) | 0.0217(16) | -0.0007(14) | 0.0027(14)  | 0.0038(15)  |
| C25 | 0.0123(15) | 0.0216(16) | 0.0183(15) | -0.0019(13) | 0.0010(12)  | 0.0013(13)  |
| C26 | 0.0249(18) | 0.0203(17) | 0.0233(16) | 0.0029(14)  | 0.0014(14)  | 0.0004(14)  |
| C27 | 0.0289(19) | 0.030(2)   | 0.0292(18) | 0.0035(15)  | 0.0084(16)  | 0.0036(16)  |
| C28 | 0.038(2)   | 0.033(2)   | 0.0282(18) | 0.0012(16)  | 0.0084(17)  | -0.0060(17) |
| C29 | 0.066(3)   | 0.031(2)   | 0.0301(19) | 0.0140(16)  | 0.010(2)    | -0.009(2)   |
| C30 | 0.058(3)   | 0.0245(19) | 0.032(2)   | 0.0066(15)  | 0.003(2)    | 0.008(2)    |
| C31 | 0.037(2)   | 0.0206(17) | 0.0245(17) | 0.0031(13)  | 0.0037(16)  | 0.0098(16)  |
| C32 | 0.0160(16) | 0.0234(17) | 0.0238(16) | -0.0033(13) | -0.0016(14) | -0.0003(14) |
| C33 | 0.0174(16) | 0.0240(17) | 0.0225(16) | 0.0003(14)  | -0.0006(14) | 0.0021(14)  |
| C34 | 0.0231(17) | 0.0281(19) | 0.0289(18) | -0.0035(14) | -0.0032(15) | 0.0034(15)  |
| C35 | 0.0300(19) | 0.0290(19) | 0.0266(17) | -0.0044(15) | -0.0043(16) | 0.0022(16)  |
| C36 | 0.0310(19) | 0.0227(17) | 0.0228(16) | -0.0044(14) | 0.0039(16)  | -0.0012(16) |
| C37 | 0.0235(17) | 0.0249(18) | 0.0256(17) | -0.0019(14) | 0.0003(15)  | 0.0068(15)  |

**Hydrogen atomic coordinates and isotropic atomic displacement parameters ( $\text{\AA}^2$ ):**

|      | x/a    | y/b    | z/c    | U(eq) |
|------|--------|--------|--------|-------|
| H2A  | 0.3582 | 0.4788 | 0.5147 | 0.029 |
| H2B  | 0.5878 | 0.454  | 0.5045 | 0.029 |
| H4A  | 0.8678 | 0.5042 | 0.55   | 0.03  |
| H4B  | 0.8089 | 0.5563 | 0.5906 | 0.03  |
| H6A  | 0.4507 | 0.5988 | 0.58   | 0.041 |
| H6B  | 0.4425 | 0.5486 | 0.6231 | 0.041 |
| H6C  | 0.2753 | 0.5402 | 0.5842 | 0.041 |
| H7A  | 0.8758 | 0.3695 | 0.5659 | 0.029 |
| H7B  | 1.0848 | 0.41   | 0.5768 | 0.029 |
| H8A  | 1.102  | 0.2974 | 0.6085 | 0.031 |
| H8B  | 0.89   | 0.3095 | 0.6345 | 0.031 |
| H9   | 1.2521 | 0.3907 | 0.6512 | 0.022 |
| H10A | 0.8666 | 0.3945 | 0.6972 | 0.024 |
| H10B | 1.064  | 0.438  | 0.7132 | 0.024 |
| H11A | 0.8441 | 0.5105 | 0.6694 | 0.026 |
| H11B | 1.0642 | 0.5033 | 0.6462 | 0.026 |
| H13A | 0.9683 | 0.2432 | 0.6987 | 0.051 |
| H13B | 0.9731 | 0.2999 | 0.7385 | 0.051 |
| H13C | 1.1191 | 0.2322 | 0.7405 | 0.051 |
| H14A | 1.274  | 0.2278 | 0.6501 | 0.064 |
| H14B | 1.4349 | 0.2267 | 0.6906 | 0.064 |
| H14C | 1.4567 | 0.284  | 0.6515 | 0.064 |

|      |         |        |        |       |
|------|---------|--------|--------|-------|
| H15A | 1.4645  | 0.372  | 0.7155 | 0.04  |
| H15B | 1.4241  | 0.3088 | 0.75   | 0.04  |
| H15C | 1.2748  | 0.3757 | 0.7495 | 0.04  |
| H16  | 0.562   | 0.655  | 0.4298 | 0.02  |
| H17A | 0.3082  | 0.7478 | 0.4774 | 0.027 |
| H17B | 0.5352  | 0.763  | 0.4583 | 0.027 |
| H18  | 0.2476  | 0.8289 | 0.4173 | 0.026 |
| H19A | 0.6032  | 0.7958 | 0.3846 | 0.026 |
| H19B | 0.4276  | 0.8143 | 0.3484 | 0.026 |
| H20A | 0.4256  | 0.7001 | 0.3249 | 0.022 |
| H20B | 0.604   | 0.6819 | 0.3605 | 0.022 |
| H23A | 0.1471  | 0.7614 | 0.3269 | 0.031 |
| H23B | -0.0425 | 0.7924 | 0.3546 | 0.031 |
| H23C | -0.0451 | 0.7121 | 0.3382 | 0.031 |
| H24A | -0.1051 | 0.7539 | 0.4329 | 0.034 |
| H24B | 0.0364  | 0.6945 | 0.4551 | 0.034 |
| H24C | -0.1147 | 0.6746 | 0.4148 | 0.034 |
| H25A | 0.1257  | 0.6094 | 0.3453 | 0.021 |
| H25B | 0.1323  | 0.5782 | 0.3949 | 0.021 |
| H26  | 0.3013  | 0.4555 | 0.4191 | 0.027 |
| H27A | -0.0659 | 0.3953 | 0.3838 | 0.035 |
| H27B | -0.0492 | 0.4707 | 0.4077 | 0.035 |
| H28A | 0.0275  | 0.4184 | 0.4767 | 0.04  |
| H28B | -0.1768 | 0.3822 | 0.458  | 0.04  |
| H29A | 0.0597  | 0.2969 | 0.4867 | 0.051 |
| H29B | 0.005   | 0.2824 | 0.4352 | 0.051 |
| H30A | 0.3575  | 0.2706 | 0.4435 | 0.046 |
| H30B | 0.374   | 0.3459 | 0.4674 | 0.046 |
| H31A | 0.4859  | 0.3588 | 0.3937 | 0.033 |
| H31B | 0.2816  | 0.3228 | 0.3747 | 0.033 |
| H32  | 0.0987  | 0.3893 | 0.3212 | 0.025 |
| H33A | -0.1008 | 0.4911 | 0.3225 | 0.026 |
| H33B | 0.0476  | 0.5277 | 0.2866 | 0.026 |
| H34A | -0.2026 | 0.4064 | 0.2707 | 0.032 |
| H34B | -0.2334 | 0.4821 | 0.2481 | 0.032 |
| H35A | 0.0596  | 0.4687 | 0.2055 | 0.034 |
| H35B | -0.0803 | 0.4004 | 0.1982 | 0.034 |
| H36A | 0.2712  | 0.3708 | 0.209  | 0.031 |
| H36B | 0.1257  | 0.3337 | 0.2453 | 0.031 |
| H37A | 0.41    | 0.3805 | 0.2837 | 0.03  |
| H37B | 0.3746  | 0.4565 | 0.2615 | 0.03  |

# Selected Spectra

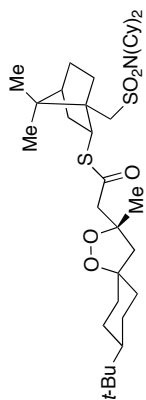

1,2-dioxolane 11

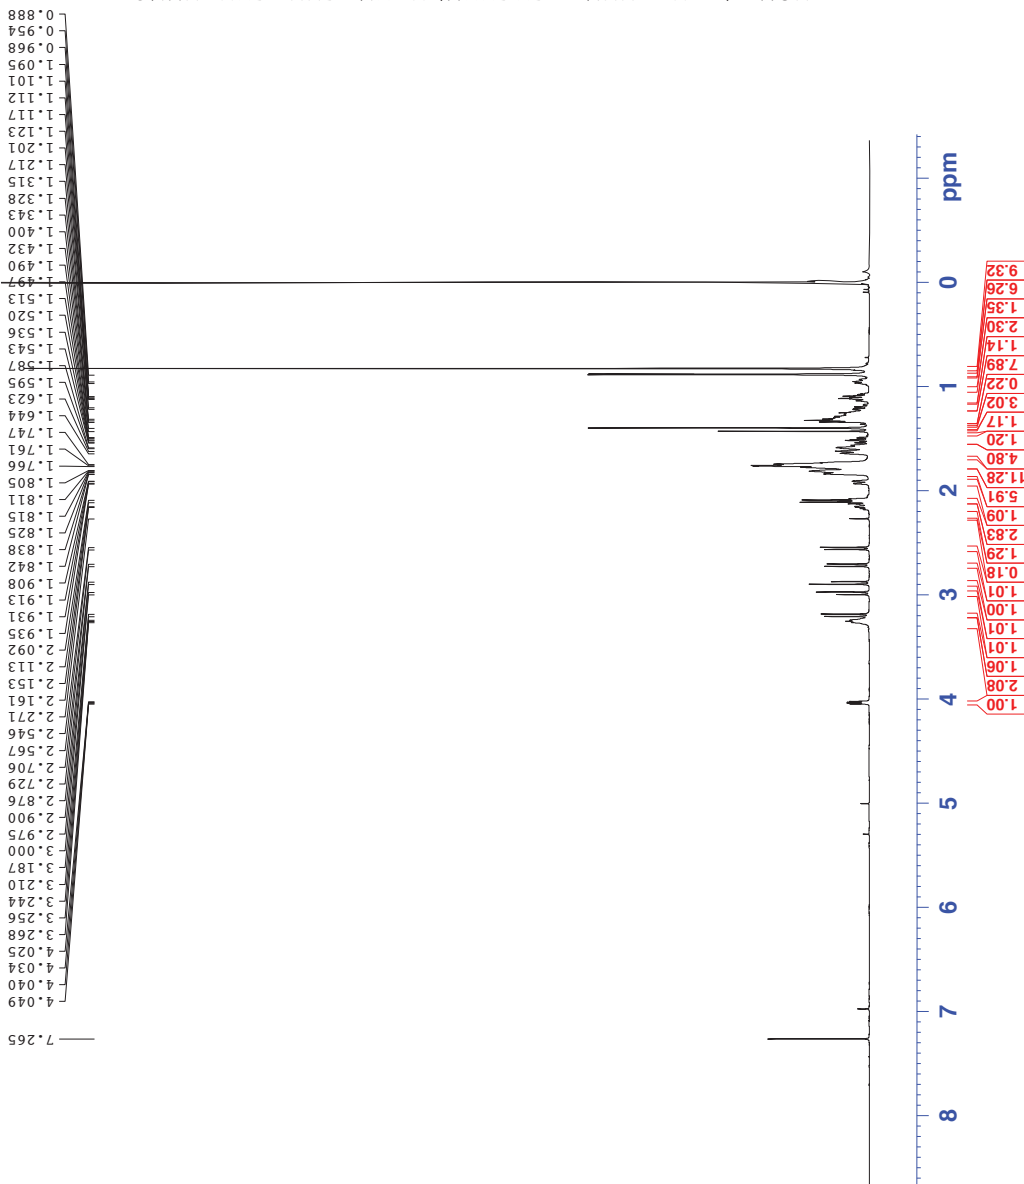

```

Current Data Parameters
NAME      RAL163_54-67
EXPNO    1
PROCNO   1

F2 - Acquisition Parameters
Date_    20130316
Time_    17.42
INSTRUM  spect
PROBHD   5 mm PABBO BB/
PULPROG  zg30
TD        65536
SOLVENT  CDCl3
NS        16
DS        2
SWH       12335.526 Hz
FIDRES    0.188225 Hz
AQ        2.6564426 sec
RG        33.59
DW        40.533 usec
DE        6.50 usec
TE        298.1 K
D1        2.0000000 sec
TD0       1

===== CHANNEL f1 =====
NUC1      1H
P1        11.00 usec
PLW1     26.5000000 W
SF01     600.1937064 MHz

F2 - Processing parameters
SI        65536
SF        600.1900114 MHz
WDW       EM
SSB       0
LB        0.30 Hz
GB        0
PC        1.00
    
```



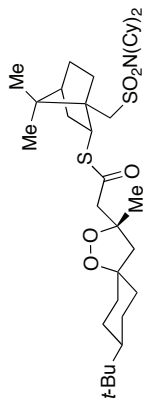

**1,2-dioxolane 11**

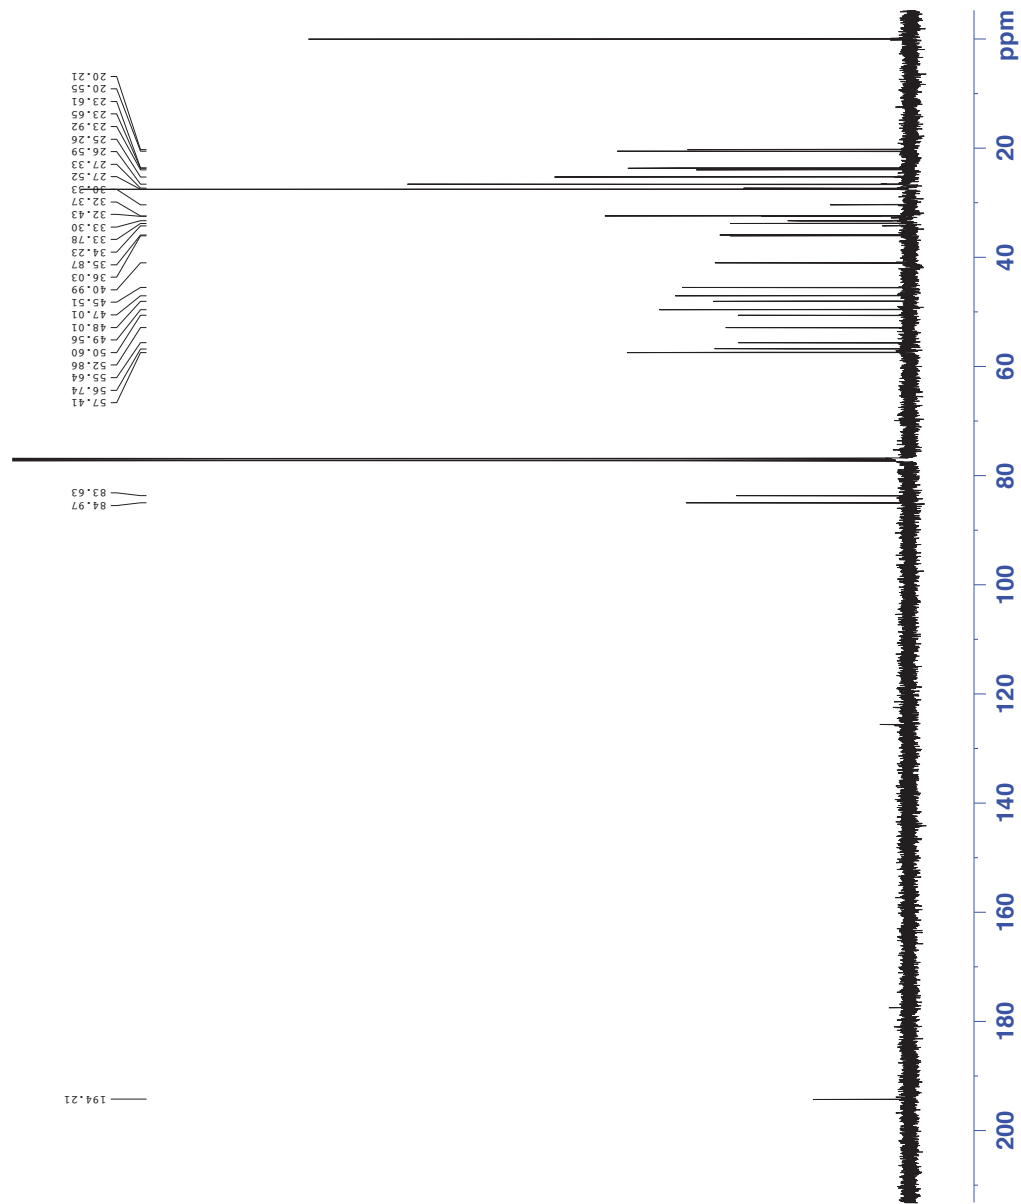

Current Data Parameters  
 NAME RAL163\_54-67\_C  
 EXPNO 1  
 PROCNO 1

F2 - Acquisition Parameters  
 Date\_ 20130316  
 Time\_ 17.49  
 INSTRUM spect  
 PROBHD 5 mm PABBO BB7  
 PULPROG zgpg30  
 TD 65536  
 SOLVENT CDC13  
 NS 193  
 DS 4  
 SWH 36057.691 Hz  
 FIDRES 0.550197 Hz  
 AQ 0.9088159 sec  
 RG 184.65  
 DW 13.867 usec  
 DE 6.50 usec  
 TE 298.1 K  
 D1 2.50000000 sec  
 D11 0.03000000 sec  
 TD0 1

==== CHANNEL f1 =====  
 NUC1 13C  
 P1 10.65 usec  
 PLW1 104.00000000 W  
 SF01 150.9329866 MHz

==== CHANNEL f2 =====  
 CPDPRG2 waltz16  
 NUC2 1H  
 P1 70.00 usec  
 PLW2 26.50000000 W  
 PLW12 0.65438998 W  
 PLW13 0.32065001 W  
 SF02 600.1924008 MHz

F2 - Processing parameters  
 SI 32768  
 SF 150.9178952 MHz  
 WDW EM  
 SSB 0  
 LB 0  
 GB 0  
 PC 1.40

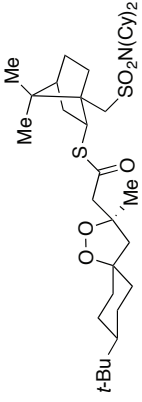

**1,2-dioxolane 12**

4.036  
4.027  
4.021  
4.012  
3.268  
3.256  
3.244  
3.176  
3.153  
3.003  
2.979  
2.862  
2.837  
2.716  
2.693  
2.481  
2.460  
2.178  
2.169  
2.155  
2.130  
2.114  
2.107  
2.094  
2.074  
1.955  
1.950  
1.932  
1.927  
1.834  
1.825  
1.816  
1.812  
1.797  
1.769  
1.762  
1.757  
1.739  
1.726  
1.629  
1.607  
1.584  
1.546  
1.539  
1.523  
1.516  
1.500  
1.458  
1.432  
1.327  
1.312  
1.254  
1.106  
1.084  
0.895  
0.890  
0.832

Current Data Parameters  
 NAME RAL163\_90-end  
 EXPNO 1  
 PROCNO 1

F2 - Acquisition Parameters  
 Date\_ 20130316  
 Time\_ 18.17  
 INSTRUM spect  
 PROBHD 5 mm PABBO BB/  
 PULPROG zg30  
 TD 65536  
 SOLVENT CDCl3  
 NS 16  
 DS 2  
 SWH 12335.526 Hz  
 FIDRES 0.188225 Hz  
 AQ 2.6564426 sec  
 RG 33.59  
 DW 40.533 usec  
 DE 6.50 usec  
 TE 298.1 K  
 D1 2.00000000 sec  
 TDO 1

==== CHANNEL f1 =====  
 NUC1 1H  
 P1 11.00 usec  
 PLW1 26.50000000 W  
 SF01 600.1937064 MHz

F2 - Processing parameters  
 S1 65536  
 SF 600.1900106 MHz  
 WDW EM  
 SSB 0  
 LB 0 0.30 Hz  
 GB 0  
 PC 1.00

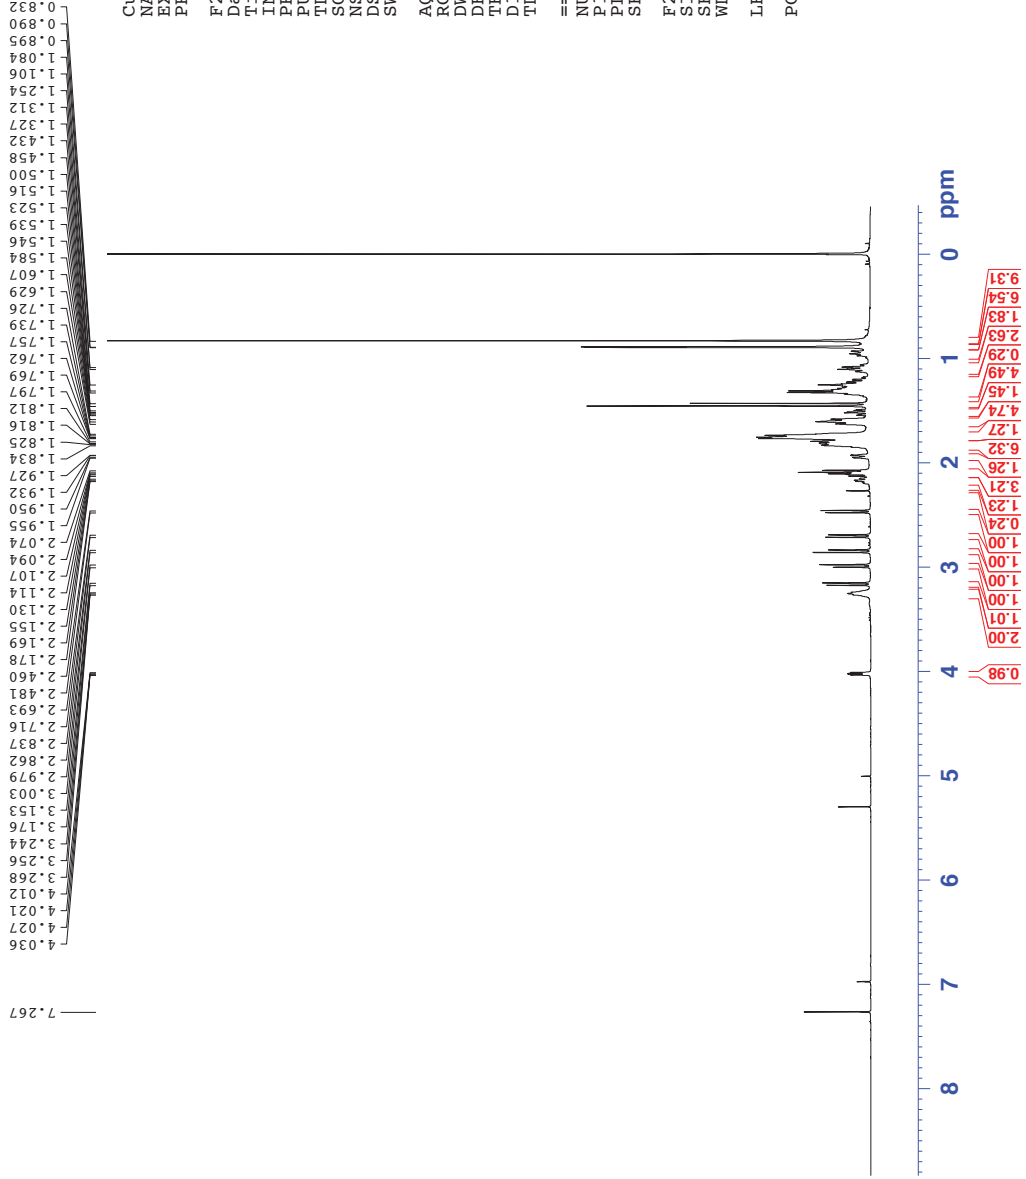

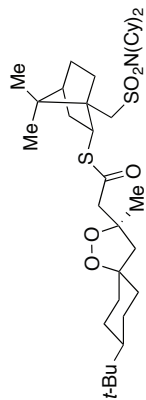

1,2-dioxolane 12

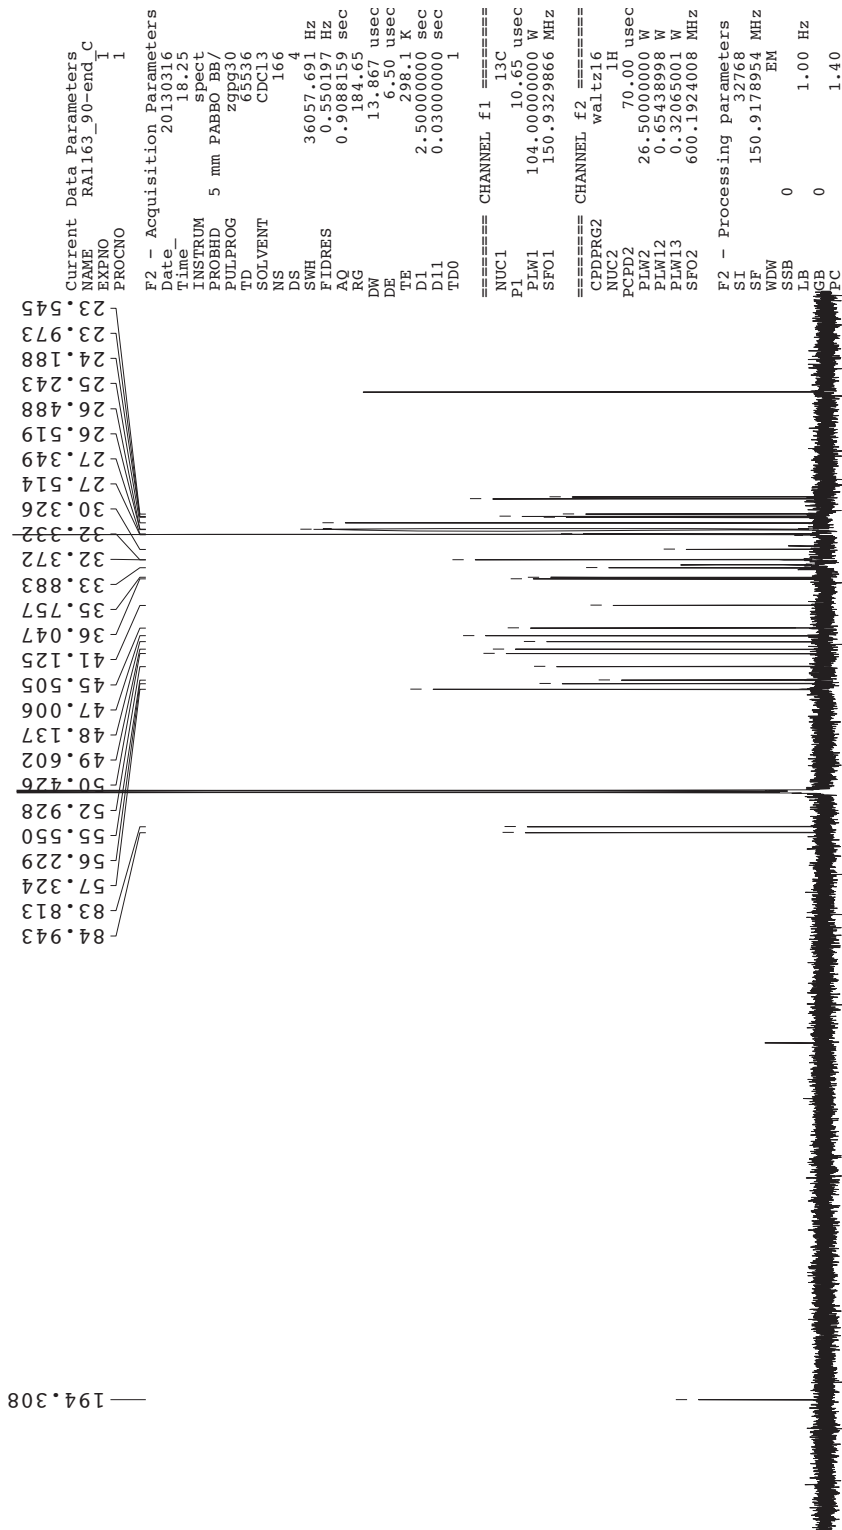

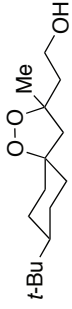

**FINO<sub>2</sub>**

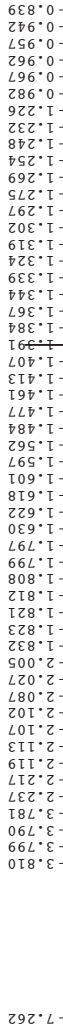

```

Current Data Parameters
NAME      RAL174_84-107
EXPNO    1
PROCNO   1

F2 - Acquisition Parameters
Date_    20130606
Time_    16.50
INSTRUM  spect
PROBHD   5 mm PAQXI 1H/
PULPROG  zg30
TD        65536
SOLVENT  CDCl3
NS        16
DS        2
SWH       12335.526 Hz
FIDRES    0.188225 Hz
AQ         2.65564426 sec
RG         164.46
DW         40.533 usec
DE         6.50 usec
TE         298.1 K
D1         2.00000000 sec
TD0        1

===== CHANNEL f1 =====
NUC1       1H
P1         9.79 usec
PLW1       9.30000019 W
SFO1       600.1937064 MHz

F2 - Processing parameters
SI         65536
SF         600.1900134 MHz
WDW        EM
SSB        0
LB         0.30 Hz
GB         0
PC         1.00
  
```

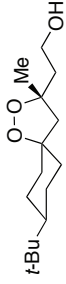

(+)-FINO<sub>2</sub>

0.812  
3.803  
3.793  
3.785  
2.235  
2.215  
2.105  
2.085  
2.025  
2.016  
2.003  
1.998  
1.992  
1.831  
1.822  
1.820  
1.811  
1.807  
1.798  
1.796  
1.787  
1.621  
1.617  
1.599  
1.596  
1.549  
1.505  
1.498  
1.482  
1.475  
1.459  
1.452  
1.412  
1.405  
1.389  
1.383  
1.366  
1.342  
1.338  
1.322  
1.318  
1.302  
1.296  
1.290  
1.274  
1.268  
1.253  
1.247  
1.231  
1.224  
0.986  
0.981  
0.975  
0.966  
0.961  
0.956  
0.946  
0.940  
0.936  
0.837

Current Data Parameters  
 NAME RAL194\_2\_61-73  
 EXPNO 1  
 PROCNO 1

F2 - Acquisition Parameters  
 Date\_ 20150411  
 Time\_ 20.31  
 INSTRUM spect  
 PROBHD 5 mm PAQXI 1H/  
 PULPROG zg30  
 TD 65536  
 SOLVENT CDC13  
 NS 16  
 DS 2  
 SWH 12335.526 Hz  
 FIDRES 0.188225 Hz  
 AQ 2.6564426 sec  
 RG 184.65  
 DW 40.533 usec  
 DE 6.50 usec  
 TE 298.1 K  
 D1 2.00000000 sec  
 TD0 1

==== CHANNEL f1 =====  
 SFO1 600.1937064 MHz  
 NUC1 1H  
 P1 10.00 usec  
 PLW1 9.60000038 W

F2 - Processing parameters  
 SI 65536  
 SF 600.1900143 MHz  
 WDW EM  
 SSB 0  
 LB 0  
 GB 0  
 PC 1.00

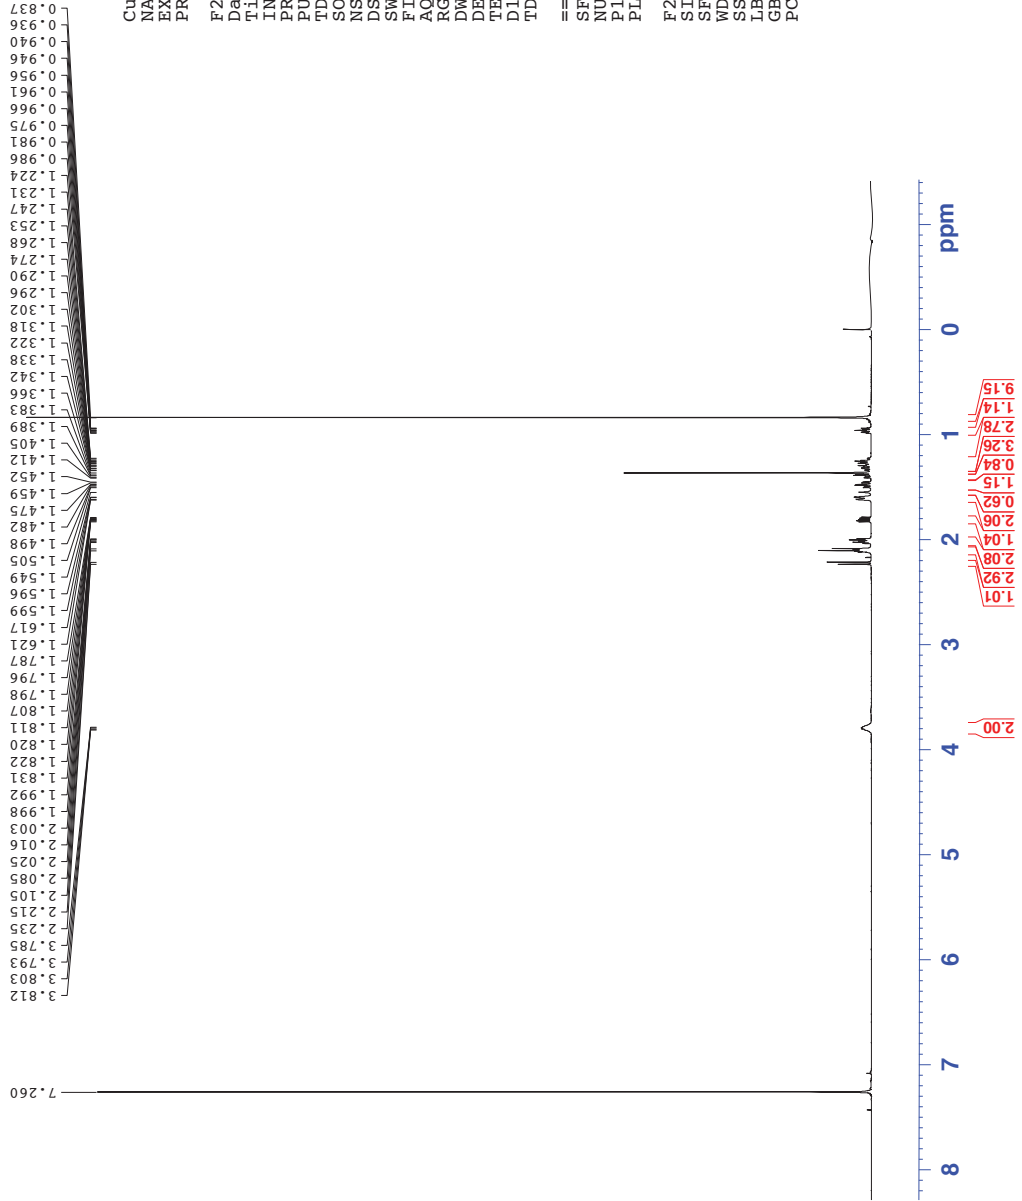

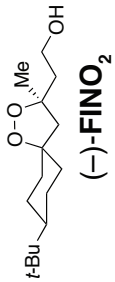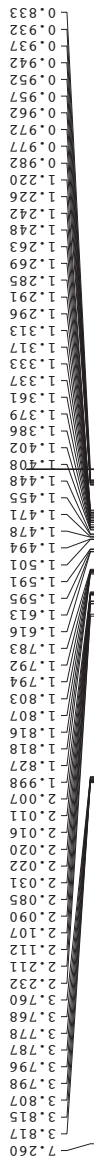

```

Current Data Parameters
NAME      RAL192_RAI
EXPNO     1
PROCNO    1

F2 - Acquisition Parameters
Date_     20150403
Time_     12.07
INSTRUM   spect
PROBHD    5 mm PAQXI 1H/
PULPROG   zg30
TD         65536
SOLVENT   CDCl3
NS         16
DS         0
SWH        12335.526 Hz
FIDRES     0.188225 Hz
AQ         2.6564426 sec
RG         184.65
DW         40.533 usec
DE         6.50 usec
TE         298.1 K
D1         2.00000000 sec
TD0        1

===== CHANNEL f1 =====
SFO1      600.1937064 MHz
NUC1       1H
P1         10.00 usec
PLW1       9.60000038 W

F2 - Processing parameters
SI         65536
SF         600.1900150 MHz
WDW        no
SSB        0
LB         0 Hz
GB         0
PC         1.00
  
```

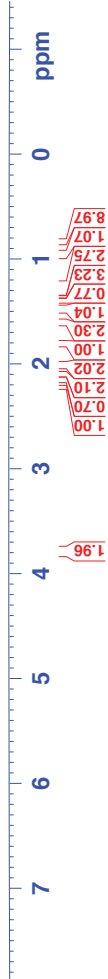

## References

1. Gratzner, H. G. (1982) Monoclonal antibody to 5-bromo- and 5-iododeoxyuridine: A new reagent for detection of DNA replication, *Science* 218, 474–475.
2. Ramirez, A., and Woerpel, K. A. (2005) Synthesis of 1,2-Dioxolanes by Annulation Reactions of Peroxycarbenium Ions with Alkenes, *Org. Lett.* 7, 4617–4620.
3. Li, Y., Hao, H.-D., Zhang, Q., and Wu, Y. (2009) A Broadly Applicable Mild Method for the Synthesis of gem-Diperoxides from Corresponding Ketones or 1,3-Dioxolanes, *Org. Lett.* 11, 1615–1618.
4. Giron, D. (2002) Applications of Thermal Analysis and Coupled Techniques in Pharmaceutical Industry, *J. Therm. Anal. Calorim.* 68, 335–357.
5. Stong, R. C., Korsmeyer, S. J., Parkin, J. L., Arthur, D. C., and Kersey, J. H. (1985) Human acute leukemia cell line with the t(4;11) chromosomal rearrangement exhibits B lineage and monocytic characteristics, *Blood* 65, 21–31.
6. Bodnar, A. G., Ouellette, M., Frolkis, M., Holt, S. E., Chiu, C.-P., Morin, G. B., et al. (1998) Extension of Life-Span by Introduction of Telomerase into Normal Human Cells, *Science* 279, 349–352.
7. Jiang, X.-R., Jimenez, G., Chang, E., Frolkis, M., Kusler, B., Sage, M., et al. (1999) Telomerase expression in human somatic cells does not induce changes associated with a transformed phenotype, *Nat. Genet.* 21, 111–114.
8. Pear, W. S., Nolan, G. P., Scott, M. L., and Baltimore, D. (1993) Production of high-titer helper-free retroviruses by transient transfection, *Proc. Natl. Acad. Sci. U. S. A.* 90, 8392–8396.
9. Hahn, W. C., Counter, C. M., Lundberg, A. S., Beijersbergen, R. L., Brooks, M. W., and Weinberg, R. A. (1999) Creation of human tumour cells with defined genetic elements, *Nature* 400, 464–468.

10. Cheng, Z., Gong, Y., Ma, Y., Lu, K., Lu, X., Pierce, L. A., et al. (2013) Inhibition of BET Bromodomain Targets Genetically Diverse Glioblastoma, *Clin. Cancer Res.* *19*, 1748–1759.
11. Chen, C., and Okayama, H. (1987) High-efficiency transformation of mammalian cells by plasmid DNA, *Mol. Cell. Biol.* *7*, 2745–2752.
12. Ishiura, M., Hirose, S., Uchida, T., Hamada, Y., Suzuki, Y., and Okada, Y. (1982) Phage Particle-Mediated Gene Transfer to Cultured Mammalian Cells, *Mol. Cell. Biol.* *2*, 607–616.
13. Gottlieb, H. E., Kotlyar, V., and Nudelman, A. (1997) NMR chemical shifts of common laboratory solvents as trace impurities, *J. Org. Chem.* *62*, 7512–7515.
14. Pangborn, A. B., Giardello, M. A., Grubbs, R. H., Rosen, R. K., and Timmers, F. J. (1996) Safe and Convenient Procedure for Solvent Purification, *Organometallics* *15*, 1518–1520.
15. McCloskey, C. M. (1989) Safe handling of organic peroxides: An overview, *Plant/Operations Progress* *8*, 185–188.
16. Gaunt, M. J., Hook, D. F., Tanner, H. R., and Ley, S. V. (2003) A Practical and Efficient Synthesis of the C-16–C-28 Spiroketal Fragment (CD) of the Spongistatins, *Org. Lett.* *5*, 4815–4818.
17. Petronijevic, F. R., and Wipf, P. (2011) Total Synthesis of (±)-Cycloclavine and (±)-5-epi-Cycloclavine, *J. Am. Chem. Soc.* *133*, 7704–7707.
18. Zhao, M., Li, J., Mano, E., Song, Z., Tschaen, D. M., Grabowski, E. J. J., et al. (1999) Oxidation of Primary Alcohols to Carboxylic Acids with Sodium Chlorite Catalyzed by TEMPO and Bleach, *J. Org. Chem.* *64*, 2564–2566.
19. Knoppe, S., Kothalawala, N., Jupally, V. R., Dass, A., and Burgi, T. (2012) Ligand dependence of the synthetic approach and chiroptical properties of a magic cluster protected with a bicyclic chiral thiolate, *Chem. Commun.* *48*, 4630–4632.



20. Oppolzer, W., Chapuis, C., and Bernardinelli, G. (1984) Asymmetric diels-alder reactions : facile preparation and structure of sulfonamido-isobornyl acrylates, *Tetrahedron Lett.* 25, 5885–5888.
21. Dussault, P. H., K. Trullinger, T., and Cho-Shultz, S. (2000) Chiral Silyl Ketene Acetals from Thioesters: Reaction with Acetals and Peroxyacetals to form 3-Alkoxy- and 3-Peroxyalkanoates, *Tetrahedron* 56, 9213–9220.
22. Jin, H.-X., Liu, H.-H., Zhang, Q., and Wu, Y. (2005) On the Susceptibility of Organic Peroxy Bonds to Hydride Reduction, *J. Org. Chem.* 70, 4240–4247.
